# Supplementary material for: Assessing Environmental Change Associated with Early Eocene Hyperthermals in the Atlantic Coastal Plain, USA
Source: Copernicus journal article supplement (doi:10.5194/egusphere-2023-58), 2023-01-27
Supplement: Supplementary file [file egusphere-2023-58-RC1-supplement.pdf]

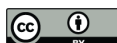

# Assessing Environmental Change Associated with Early Eocene Hyperthermals in the Atlantic Coastal Plain, USA

William Rush<sup>1,2</sup>, Jean Self-Trail<sup>3</sup>, Yang Zhang<sup>4</sup>, Appy Sluijs<sup>5</sup>, Henk Brinkhuis<sup>5,6</sup>, James Zachos<sup>7</sup>, James G Ogg<sup>8,9,10</sup>, Marci Robinson<sup>3</sup>

5 <sup>1</sup>Department of Earth and Planetary Sciences, Yale University, 210 Whitney Avenue, New Haven, CT 06511, USA

<sup>2</sup>Cooperative Institute for Research in Environmental Sciences, University of Colorado Boulder, 216 UCB, Boulder, CO 80309, USA

<sup>3</sup>U.S. Geological Survey, Florence Bascom Geoscience Center, Reston, Virginia, USA

<sup>4</sup>Faculty of Geosciences, University of Bremen, Bremen, Germany

10 <sup>5</sup>Department of Earth Sciences, Faculty of Geosciences, Utrecht University. Princetonlaan 8a, 3584 CB Utrecht, The Netherlands

<sup>6</sup>Dept of Ocean Systems research, NIOZ Royal Netherlands Institute of Sea Research, PO Box 59, 1790 AB Den Burg, Texel, The Netherlands

15 <sup>7</sup>Department of Earth and Planetary Sciences, University of California Santa Cruz, 1156 High Street, Santa Cruz, CA 95064, USA

<sup>8</sup>Department of Earth, Atmospheric and Planetary Sciences, Purdue University, 550 Stadium Mall Drive, West Lafayette, IN 47907-2051, USA

<sup>9</sup>State Key Laboratory of Oil and Gas Reservoir Geology and Exploitation, Chengdu University of Technology, 610059 Chengdu, Sichuan, China

20 <sup>10</sup>International Union of Geological Sciences, Deep-time Digital Earth Research Center of Excellence (Suzhou), 1699 Zu Chongzhi South Road, Kunshan (Jiangsu), China

*Correspondence to:* William Rush (william.rush@yale.edu)

**Abstract.** Eocene transient global warming events (hyperthermals) can provide insight into a future, warmer world. While much research has focused on the Paleocene-Eocene Thermal Maximum (PETM), hyperthermals of smaller magnitude can be used to characterize climatic responses over different magnitudes of forcing. This study identifies two events, Eocene Thermal Maximum 2 (ETM2 and H2) for the first time in a shallow marine setting along the United States Atlantic margin in the Salisbury Embayment of Maryland, based on magnetostratigraphy, calcareous nannofossil and dinocyst biostratigraphy, and recognition of negative stable carbon isotope excursions (CIEs) in biogenic calcite. We assess local environmental change in the Salisbury Embayment utilizing clay mineralogy, marine palynology,  $\delta^{18}\text{O}$  of biogenic calcite, and biomarker paleothermometry (TEX<sub>86</sub>). Paleo-temperature proxies show broad agreement between surface water and bottom water temperature changes. However, the timing of warming does not correspond to the CIE of ETM2 as expected from other records, and the highest values are observed during H2, suggesting factors other than pCO<sub>2</sub> forcing influenced temperature changes in the region. The ETM2 interval exhibits a shift in clay mineralogy from smectite-dominated facies to illite-rich facies, suggesting hydroclimatic changes but with a rather dampened weathering response relative to that of the PETM in the same region. Organic walled dinoflagellate cyst assemblages show large fluctuations throughout the studied section, none of which seem systematically related to ETM2. These observations are contrary to the typical tight correspondence between climate change and assemblages across the PETM, regionally and globally, and ETM2 in the Arctic Ocean. The data do indicate very

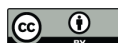

warm and (seasonally) stratified conditions, likely salinity-driven, across H2. The absence of evidence for strong perturbations  
 40 in local hydrology and nutrient supply during ETM2 and H2, compared to the PETM, is consistent with the less extreme  
 forcing and the warmer pre-event baseline, as well as the non-linear response in hydroclimates to greenhouse forcing.

## 1 Introduction

The Early Eocene is punctuated by a series of transient phases of carbon input and global warming, termed hyperthermals  
 (e.g., Thomas and Zachos, 2000; Cramer et al., 2003; Littler et al., 2014). The well-studied Paleocene-Eocene Thermal  
 45 Maximum (PETM) may represent the closest approximation to modern day warming in the geologic record (Zachos et al.,  
 2008). However, debate exists as to the origins of this event with respect to the primary source of carbon (Zeebe and Lourens,  
 2019; Zachos et al., 2010; Reynolds et al., 2017; Dickens et al., 1997; Frieling et al., 2019; Gutjahr et al., 2017). The mass of  
 C released and rise in  $p\text{CO}_2$  is relatively well constrained by records of seafloor carbonate dissolution and surface ocean pH  
 (Zachos et al., 2005; Penman et al., 2014; Gutjahr et al., 2017). Along continental margins, for example in the Salisbury  
 50 Embayment, located within the Mid-Atlantic Coastal Plain of the United States, the PETM is marked by sedimentological and  
 biotic evidence of strong hydrological perturbations (Kopp et al., 2009; Sluijs and Brinkhuis, 2009; Stassen et al., 2012b; Self-  
 Trail et al., 2012; Self-Trail et al., 2017b; Rush et al., 2021). Eocene Thermal Maximum 2 (ETM2), ~2 million years after the  
 PETM is characterized by warming and C release, though each about 1/3 that of the PETM (Lourens et al., 2005; Sluijs et al.,  
 2009; Stap et al., 2010; Dunkley Jones et al., 2013; Gutjahr et al., 2017; Harper et al., 2020). ETM2 can provide insight into  
 55 the climatic impacts of a smaller carbon forcing ( $p\text{CO}_2$ ) when compared to the PETM from geographically similar sites, and  
 hence sensitivity to greenhouse forcing.

Intensification of the hydrologic cycle is a critical feature of the climatic response to greenhouse forcing (e.g., Carmichael et  
 al., 2017). Evidence for a pronounced mode shift during the PETM includes enhanced sediment-fluxes in sections from the  
 mid-Atlantic margin which suggest increased frequency of precipitation extremes leading to high energy fluvial activity as  
 60 well as associated abundances of low-salinity tolerant biota (John et al., 2008; Self-Trail et al., 2017b; Stassen et al., 2012b;  
 Rush et al. 2021; Sluijs and Brinkhuis, 2009). Similar signals have been found in many regions across various hyperthermals,  
 including the Pyrenees, the margins of the Tethys, New Zealand, the North Sea Basin, and the arctic (Schmitz and Pujalte,  
 2007; Jiang et al., 2021; Slotnick et al., 2012; Sluijs et al., 2014; Sluijs et al., 2007; Jin et al., 2022; Harding et al., 2011).  
 These changes in extreme precipitation patterns are consistent with projections for future change (Pfahl et al., 2017; Swain et  
 65 al., 2018). Studying the impacts of hydroclimatic changes in response to differing degrees of carbon forcings can inform as to  
 the linearity of these responses, “tipping point” thresholds, and background variability of the hydrosphere.

Given the extensive evidence of a mode shift in coastal mid-Atlantic hydroclimate during the PETM, we initiated a regional  
 search for ETM2. We here identify ETM2 and H2 (~54 Ma) in the Knapps Narrows core based on biostratigraphic,  
 paleomagnetic, and chemostratigraphic data. We present proxy records of the regional climatic response, including

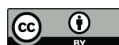

70 foraminiferal  $\delta^{18}\text{O}$  and  $\text{TEX}_{86}$  based temperature reconstructions, clay mineralogy, and organic walled dinoflagellate cyst ('dinocyst') assemblages and compare the results to published records of the PETM from this region.

## 2 Materials and Methods

### 2.1 Material

The Knapps Narrows core was drilled at 38.72129N, -76.33162W on the Eastern Shore of Maryland in close proximity to drill sites which have been extensively studied for the PETM, South Dover Bridge and Howards Tract (Figure 1). The cored target interval lies between 84-102 meters in the Nanjemoy Formation. From the bottom of the section to 88.4 meters, lithology is dominated by very coarse- to fine-grained, poorly sorted, angular to subrounded sand, comprised of ~50% glauconite, ~30% quartz, and <5% muddy matrix. Between 88.4 meters to the top of the section, the core largely consists of very coarse to medium-grained, subrounded to angular clayey sand with poorly sorted glauconite (~40%) and quartz (~10%) in a muddy matrix (20%). Sand fines upsection and clay content decreases. The sediments are heavily bioturbated throughout. Due to local faulting, the Marlboro Clay deposited during the Early Eocene PETM is entirely absent and an expanded slightly younger Lower Eocene interval equivalent to calcareous nannofossil zone NP11, which contains ETM2, is present (Cramer et al., 2003; Lourens et al., 2005). This disconformity and resultant paleobathymetry likely contributed to the enhanced sedimentation rates and expanded section recorded in the core (Appendix 1). Initial core description noted much coarser grain-sizes when compared to the Nanjemoy in nearby cores, further supporting the interpretation of rapid infilling during this time. All raw data are included in the supplemental datasets that are posted at PANGAEA.

### 2.2 Methods

#### 2.2.1 Nannofossil Biostratigraphy

The calcareous nannofossil biozonation was established and core descriptions were made in the field and at the U.S. Geological Survey (USGS) Florence Bascom Geoscience Center. Forty-two samples for calcareous nannofossil analysis were taken from the center of freshly broken core to avoid contamination from drilling fluid. Smear slides for calcareous nannofossil analysis were prepared using the standard technique of Bown and Young (1998) combined with the double slurry technique of Blair and Watkins (2009) and mounted using Norland Optical Adhesive 61. Slides were examined under cross-polarized light using a Zeiss Axioplan 2 light microscope (LM) at 1250x magnification. Biostratigraphic zones assigned to each species were based on the NP zonation of Martini (1971) and supplemented by the biohorizons of Agnini et al. (2014). Smear slides are housed in the USGS calcareous nannofossil laboratory in Reston, VA.



### 2.2.2 Paleomagnetism

Paleomagnetic data were generated at the Paleomagnetism Lab of Lehigh University. A total of ~100 minicores were collected from the Knapps Narrows core (40–110 m) with sampling spacing of 0.2 to 1.5 m guided by preliminary biostratigraphic constraints. Stepwise thermal demagnetization in an ASC Model TD 48-SC thermal demagnetizer was applied to the samples followed by measurement on a three axis 2G Enterprises 755 superconducting rock magnetometer. Heating involved at least 7 treatments, at ~25 °C/50 °C steps from 100 °C to 350 °C for the weak samples and up to 575-600 °C for stronger ones. Thermal demagnetization generally ceased when the remanent magnetization displayed either anomalous surges in magnetization, was too weak for magnetometer precision, or exhibited irregular magnetic directions/intensities for two or three consecutive steps. The choice of a thermal rather than an AF-demagnetization procedure was due to potential existence of high-coercivity magnetic minerals (e.g., goethite).

Samples from rotary cores have no control on their declination orientation. The overprint components from drilling-induced magnetization and from normal-polarity present-day (Late Quaternary) field remanence are observed and could often be easily removed during initial demagnetization steps. Instead, normal (N) or reversed (R) polarity could be indicated by natural remnant magnetization (NRM), pointing downward (N) or upward (R). The present-day magnetic field direction is -11.11° declination and 64.88° inclination (from <https://www.ngdc.noaa.gov/geomag-web/#igrfwmm> for the modern Knapps Narrows core location), which should be roughly the same as the Eocene since no major continental movement has occurred.

Polarity zones were assigned to stratigraphic clusters of good quality characteristic remanent magnetization (ChRM) vectors, while uncertain intervals were assigned to clusters of noisy magnetic behaviors and to significant gaps in sampling coverage. Detailed paleomagnetic data and additional data analysis protocol are available in the supplementary paleomagnetism excel workbook.

Given that sediments are largely semi-consolidated, a non-magnetic plastic tube was inserted in the core to extract a sediment plug. The plug was then extruded into aluminum foil pieces and tightly wrapped. Occasionally, paleomagnetic samples were taken by pushing non-magnetic cubes directly into the center of the core halves so that alternate field demagnetization could be used.

The interpreted polarity and characteristic directions of the samples were given a quality rating of ‘N(R)’, ‘NP(RP)’, ‘NPP(RPP)’, ‘N?(R?)’ or ‘INT’ according to a semi-subjective judgment of the behavior of the magnetic vectors during the stepwise demagnetization. The ‘N/R’ ratings were generally assigned to those samples that attained a (semi-)stable endpoint direction (Characteristic remanent magnetization, or ChRM) during progressive demagnetization. However, only a small subset of our samples displayed this ideal resolution of primary magnetization. We applied a ‘P’ tag of ‘RP’ or ‘NP’ when the residual magnetization vector was considered close to attaining an endpoint before losing its residual magnetization or experiencing a surge. The ‘PP’ tag was applied to samples that had a distinct trend toward the polarity hemisphere to be

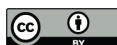

considered indicative of the underlying polarity but were considered to be too far from attaining an endpoint before dying to be used in statistics for computing a mean direction. The ‘?’ qualifier was used to denote possible trends toward an underlying polarity, and ‘INT’ is either entirely uncertain or displayed an endpoint that was intermediate between the ‘N’ and ‘R’ poles. Polarity zones were assigned to stratigraphic clusters of ChRM vectors rated as **N-NP-NPP or R-RP-RPP**. Uncertain intervals were assigned to clusters of N?-INT-R? and to significant gaps in sampling coverage. Summary plots of the lithology of the Knapps Narrows with the interpreted polarity patterns (Appendix 2) were generated with the public TSCreator database and visualization software (<https://timescalecreator.org>).

### 2.2.3 Bulk isotope stratigraphy and age model

Bulk carbonate content and bulk carbonate and benthic foraminiferal stable carbon and oxygen isotope analysis was performed in the Earth and Planetary Sciences Department at the University of California, Santa Cruz.  $\text{CaCO}_3$  content was determined using a UIC CM140 coulometer. In this system approximately 20 mg of sediment is dissolved in 2 N sulfuric acid. For isotope analyses of bulk carbonate, a mass of ground sediment was weighed to obtain 35 and 50  $\mu\text{g}$  of carbonate. All samples were analyzed with a Kiel IV Carbonate Device paired with a Thermo Scientific MAT253 Mass Spectrometer. The analytical precision of this system based on replicate analyses of **Carrera** marble standards is better than 0.05‰ for carbon isotopes.

An age model was constructed for this section on the basis of carbon isotope stratigraphy, specifically the carbon isotope excursion (CIE) minima and maxima (respectively H1 and H2) correlated to the orbitally tuned deep ocean records of Lauretano et al. (2015). This age model was then used to calculate sedimentation rates.

### 2.2.4 Spectral analysis

Spectral analysis (eCOCO) of the gamma ray wireline log of the cored interval was performed via Acycle v2.4.1 to obtain an estimate of the sedimentation rate variations (Li et al., 2019). The eCOCO analysis computes the correlation coefficient ( $\text{COCO}, \rho$ ) between the frequency spectra of target astronomical solutions and the presence of different cycles within studied data, which provides the numerical estimation of the depositional rates (higher correlation coefficient corresponds to the most likely sedimentation rates) within a sedimentary record (Li et al., 2018, 2019). Monte Carlo simulations are embedded in the COCO method to test the significant level of astronomical forcing assumption.

### 2.2.5 Palynology

Eighteen samples were processed at Utrecht University for quantitative palynological analysis. Between 3 and 15 g of freeze-dried, lightly crushed sediment was spiked with a known amount of exotic *Lycopodium* spores and subsequently treated with 30% HCl and twice with ~38–40% HF to dissolve carbonates and silicates, respectively. The insoluble residue was sieved using 15 and 250  $\mu\text{m}$  nylon mesh sieves, with ultrasonic bath steps to break up agglutinated organic matter. The resulting 15–250  $\mu\text{m}$  palynomorph fraction was mounted on glass microscope slides. A general characterization of palynofacies,



palynomorph categories (pollen, spores, aquatic algae) and dinocysts in particular, was performed with light microscopy, counting at least 200, and typically >250 elements. For taxonomy, we refer to that cited in Williams et al. (2017), with the exception of Wetzelielloid taxa (see Bijl et al., 2017). For paleoecological reconstructions, dinocyst taxa are grouped in complexes of morphologically related species and genera with assumed similar paleoecological affinities following the empirically-based complexes of e.g., Frieling and Sluijs (2018).

## 2.2.6 Clay Mineral Analysis

Clay mineral analysis was performed in the Earth and Planetary Sciences Department at the University of California, Santa Cruz. Methods were adapted from Kemp et al. (2016), Gibson et al. (2000), and Poppe et al. (2001). Samples were gently crushed and placed in a 1% sodium hexametaphosphate (Calgon) solution adjusted to a pH of 7–7.5 via the addition of ammonium hydroxide. Samples were disaggregated by placing them on a shaker table at approximately 200 rpm for 48 hours. Samples were then wet washed through a 63  $\mu\text{m}$  sieve to separate the coarse and fine fraction. Samples were then marked 5 cm from the surface of the solution and shaken to resuspend the clay minerals. The suspension was allowed to settle for 4 hours and 6 minutes at 20°C in accordance with Stoke’s Law. The suspension above the 5 cm mark was then extracted via syringe to isolate the <2 $\mu\text{m}$  size fraction. This suspension was then dried and approximately 150 mg of this clay-sized fraction was then resuspended in deionized water. The suspension was then passed through a sub-micron filter attached to a vacuum apparatus to remove the water and orient the clays. The filter paper was removed and placed on the side of a glass beaker before being transferred to a glass slide to produce an oriented mount. For the glycolation step, mounts were placed inside a desiccation chamber with ethylene glycol at 60°C for a minimum of 4 hours.

Oriented mounts were scanned in a Philips 3040/60 X’pert Pro X-ray diffraction unit from 0–35° 2 $\theta$  with a 1-degree source beam and a 1/16 degree receiving slit at 45 mA and 40 mV. The results were then printed, and individual sample peaks were weighed to provide a semi-quantitative measurement of clay mineral abundances.

## 2.2.7 Foraminifer Oxygen Isotope Paleothermometry

Temperatures based on benthic foraminiferal oxygen isotopes ratios were estimated following protocol outlined in Hollis et al. (2019). The paleotemperature equation of Marchitto et al. (2014) was used. Four to six *Anomalinoidea acutus* specimens were picked from the 180–250  $\mu\text{m}$  size fraction at each interval. All samples were analyzed with a Kiel IV Carbonate Device paired with a Thermo Scientific MAT253 Mass Spectrometer. The analytical precision of this system based on replicate analyses of Carrara marble standards is better than 0.05‰ and 0.10‰ for  $\delta^{13}\text{C}$  and  $\delta^{18}\text{O}$ , respectively. In order to calculate an absolute temperature, bottom-water  $\delta^{18}\text{O}_{\text{SW}}$  was estimated based on the relationship between salinity and  $\delta^{18}\text{O}$  established by Fairbanks (1982) and the modern-day salinity measurements reported in Richaud et al. (2016), with a -1.2‰ correction applied to account for the lack of ice during the Early Eocene.



### 2.2.8 TEX<sub>86</sub> biomarker paleothermometry

TEX<sub>86</sub> analysis was performed on 18 samples at Utrecht University. Glycerol dialkyl glycerol tetraether (GDGT) lipids were extracted from ~10 g of powdered, freeze-dried sediment in 25 ml solvent mixture of dichloromethane (DCM):methanol (MeOH) (9:1, v/v) by a Milestone Ethos X Microwave Extraction System, set to 70 °C for 50 minutes. Filtered (using NaSO<sub>4</sub> column) total lipid extracts were dried and separated in apolar, neutral and polar fractions through AlOx column chromatography, with hexane/DCM (9:1), hexane/DCM (1:1) and 1:1 DCM/MeOH (1:1), respectively as mobile phases, dried again and weighed. Polar fractions, after addition of a GDGT standard (99 ng of m/z 744) for quantitative analyses, were diluted in hexane/isopropanol (99:1) to a concentration of 2 mg/ml. A 10 µl aliquot was filtered (0.45 µm polytetrafluoroethylene) and analyzed by high-performance liquid chromatography (HPLC) coupled to ionization mass spectrometer. Analytical precision was 0.006 TEX<sub>86</sub> units, determined using an in-house GDGT standard. We use several indices to constrain potential confounding effects such as GDGT contributions from methanogenic/methanotrophic microorganisms, terrestrial sources and deepwater archaea. TEX<sub>86</sub> values were calculated from isoprenoid GDGT abundances following Schouten et al. (2002) and converted to sea surface temperature (SST) using linear and exponential calibrations (e.g., Kim et al., 2010; O'Brien et al., 2017), following recommendations by Hollis et al. (2019). Calibration errors are in the order of ±2.5°C (1 SD), but any offset from this calibration is assumed to be a constant throughout the study section.

## 3. Results

### 3.1 Stratigraphic Framework

A distinct magnetic reversal pattern is preserved in the Knapps Narrows core with the section below 99.21 m (sample KN37) exhibiting a reversed polarity and the upper section (above 91 m, sample KN36) a normal polarity. The reversal boundary, identified as the transition from magnetochron C24r to C24n based on nannoplankton stratigraphic data, thus lies within 99.21–91 m (Figure 2). According to nannoplankton data, the lowermost section is placed in lower Zone NP10 based on the first occurrence (FO) of *Rhomboaster* spp. and the absence of *Tribrachiatus contortus*. Upper Zone NP10 is identified at 96.6 m by the FO of *T. contortus* and basal Zone NP11 is identified at 95.1 m by the last occurrence of *T. contortus* along with the presence of *T. orthostylus*. This reconstructed biomagnetostratigraphy (Appendix 2, 3) is generally consistent with the Paleogene time scale 2020 (Speijer et al., 2020) and timing of ETM2 (Cramer et al., 2003; Lourens et al., 2005; Westerhold et al., 2007; Stassen et al., 2012a).

The bulk carbonate δ<sup>13</sup>C record captures a -1.5‰ excursion from 98.18–96.41 m before recovering to the baseline followed by a second -3‰ excursion between 95.37–93.46 m that peaks at 94.48 m (Figure 3). This “double peak” feature facilitates the recognition of ETM2, as it is documented for several marine and continental sections (e.g., Walvis Ridge and Bighorn Basin, Figure 3; Cramer et al., 2003; Stap et al., 2010; Abels et al., 2015). Between 93.46 and 88.98 m, carbon isotope ratios return to near baseline values before another -1.5‰ excursion at 88.51 m, consistent with observations of H2 at other sites (Figure 3;



Cramer et al., 2003; Stap et al., 2010, Abels et al., 2015). Benthic foraminiferal carbon isotope trends largely track those in  
 220 bulk carbonate. An interval with low carbonate content (~93-94.5 m, Figure 2) coincides with the CIE minima at 94.48 m,  
 where the sediments were barren of foraminifera.

The COCO and eCOCO (Figure 4) analysis shows an optimal sedimentation rate of ~5 cm/kyr for most of the succession from  
 103.5 m to 43.5 m except the interval of 90 m to ~82 m, where there is a transition to a sedimentation rate of approximately  
 13 cm/kyr. Assuming orbital forcing, the ~5 cm/kyr, and a cycle of ~18 m (Supplementary Figure 5) correlates to the 405 kyr  
 225 long eccentricity period. Given the surge in estimated sedimentation rate, then the observed ~18 m/cycle should instead  
 correlate to the short eccentricity periodicity. Given the sudden increase in deposition rate, this interval may reflect on other  
 factors, for example a period of enhanced precipitation even though this period of elevated sedimentation rates does not  
 correspond to any hyperthermal event, or bathymetric changes related to regional faulting.

### 3.2 Palynology

230 Palynological associations are dominated by marine palynomorphs, notably dinocysts and common to abundant organic linings  
 of benthic foraminifera. Terrestrial palynomorphs such as pollen and spores are rare. Dinocyst assemblages are well preserved  
 and diverse. They comprise a typical mid Early Eocene shelf assemblage given abundant contributions of *Spiniferites* spp.,  
*Operculodinium* spp., as well as species grouped in the *Areoligera* complex and *Cordosphaeridium* complex (e.g., Pross and  
 Brinkhuis, 2005; Frieling and Sluijs, 2018). The distribution pattern of various chronostratigraphic index taxa such as  
 235 *Biconodinium longissimum* and several Wetzelielloids further confirm assignment to ETM-2 and H2. The *Senegalinium*  
 complex, particularly abundant in the lower part of the section, tolerated low salinities, suggestive of strong seasonal river  
 runoff, in apparent contradiction to the absence of terrestrial pollen and spores (Brinkhuis et al., 2006; Sluijs and Brinkhuis,  
 2009).

Dinocyst abundance variability shows surprisingly little correspondence to climatic trends. Wetzelielloids, which includes the  
 240 *Apectodinium* complex and *Apectodinium* spp., show (quasi-)global abundance peaks across the PETM but demonstrate a  
 small relative increase prior to ETM2 with their highest relative abundances occurring several meters above both ETM2 and  
 H2 (Crouch et al., 2003; Frieling and Sluijs, 2018; Figure 5). The only anomaly that clearly corresponds to a hyperthermal is  
 the peak abundance of Goniodomideae during H2 (Figure 5). Goniodomideae represent a thermophile group thriving in  
 lagoonal environments (variable salinity) and further offshore under strongly stratified conditions (e.g., Reichart and Brinkhuis,  
 245 2003; Frieling and Sluijs, 2018). Taking into account the decreasing abundance of the *Senegalinium* complex, this likely points  
 to an increase in salinization during this interval, due to decreased runoff or increased evaporation. This interval also yields  
 anomalous abundances of benthic foraminifer linings, which generally indicates a temporary reduction in sedimentation,  
 further supporting the interpretation of decreased runoff during this interval.





### 3.3 Clay Mineralogy

250 Clay mineralogy shows moderate variation throughout the studied interval. However, these variations are not correlated with other proxies, and the timing of the mineralogic changes is offset relative to the CIEs of ETM2 and H2; i.e. the shift in mineralogy begins prior to the CIE of ETM2 and after the CIE of H2. There is a marked increase in illite during the body of ETM2, and an additional increase in the illite/smectite ratio immediately prior to H2 (Figure 2). There is no detectable kaolinite within the studied interval.

### 255 3.4 Oxygen Isotope Paleothermometry

There is a long term rise in temperature over the studied interval, rising from 11.1°C (-2.8/+2.9) at the base of the core to 13.4°C (-2.9/+3.0) at the top (Figure 2). The largest source of error associated with the  $\delta^{18}\text{O}$  temperature measurements is the uncertainty associated with local  $\delta^{18}\text{O}_{\text{sw}}$ . According to the Fairbanks (1982) equation, a change in salinity of  $\pm 1$  psu when propagated across calculations can result in an error in temperature on the order of  $\pm 2.9^\circ\text{C}$  depending on local freshwater  $\delta^{18}\text{O}$ .

260 This error cannot be assumed to be constant throughout the core, as hydroclimate is expected to change dramatically during this time period, which could impact local salinity, as often seems to be the case with the PETM. Agreement in temperature trends between  $\delta^{18}\text{O}$  and  $\text{TEX}_{86}$  suggests this effect is minimal. Bottom water temperatures during ETM2 were measured to be 11.6°C (+2.9/-2.8), 0.9°C warmer than the baseline value. The greatest warming is seen following the CIE associated with H2 at 14.4°C (+3.0/-2.9), 2.3°C warmer than the baseline. Peak warming seems decoupled from minimum  $\delta^{13}\text{C}$  values for both  
 265 ETM2 and H2 (Figure 2). These temperature variations are likely the minimum estimates given the resolution of the record.

### 3.5 $\text{TEX}_{86}$ Biomarker Paleothermometry

GDGT distributions indicate a dominant pelagic Thaumarchaeotal source based on low abundances of terrestrial GDGTs of and lipids derived from methanotrophs or methanogenetic microorganisms (Supplement Figure 3). GDGT2/3 ratios between 1.6 and 2.1 (Appendix 4) indicate dominant lipid origin from the upper ~150 meters of the water column (Hurley et al., 2018;  
 270 Van der Weijst et al., 2022). Although this may imply contributions from sub-thermocline Thaumarchaeota potentially compromising direct quantitative SST assessment based on the surface sediment calibration dataset, we present the results as SST reconstructions following various linear and non-linear calibrations following convention (Van der Weijst et al., 2022; Hollis et al., 2019). Variability in the  $\text{TEX}_{86}$  record should reflect SST variability very well (Ho and Laepple, 2016).

SST based on  $\text{TEX}_{86}$  vary by a few degrees, largely mirroring the benthic bottom water temperature trends (Figure 2).

275 Temperatures appear to increase prior to the body of ETM2 during the pre-onset excursion. Using a linear calibration, SST reached a maximum of  $\sim 30^\circ\text{C}$ ,  $\sim 1.1^\circ\text{C}$  higher than the baseline. Exponential calibrations result in slightly lower SSTs and slightly muted warming (SI).  $\text{TEX}_{86}$  reaches minimum values during the CIE associated with ETM2, at  $\sim 28^\circ\text{C}$ ,  $1.0^\circ\text{C}$  colder than baseline values. The trend reverses and reaches a maximum following the CIE associated with H2 at  $\sim 31^\circ\text{C}$ ,  $\sim 1.3^\circ\text{C}$  warmer than the baseline value.



## 280 4. Discussion

### 4.1 Stratigraphy and Sedimentation

Documented sections spanning the ETM2 in marine shelf settings are rare compared to sections spanning the PETM. The discovery of two smaller hyperthermals, ETM2 and H2, in addition to the PETM, on the mid-Atlantic coast along provides a unique opportunity to assess how regional climate responded to two distinct levels of greenhouse forcing. Apart from bio-  
 285 chronostratigraphy, the key to identifying ETM2 is the stable carbon isotope stratigraphy, specifically the presence of the paired CIEs of ETM2 and H2, which at Knapps Narrows is broadly consistent with trends observed elsewhere (Figure 1). The magnitude of the CIE here is intermediate to records of the ETM2 in open marine and continental settings but is consistent with observations of the PETM CIE in marginal marine settings (John et al., 2008; Tipple et al., 2011; Sluijs and Dickens, 2012). The marine carbonates of ETM2 document a smaller excursion than those observed in continental sections and in  
 290 marine organic carbon (Tipple et al., 2011; Stap et al., 2010; Westerhold et al., 2018; Abels et al., 2015; Sluijs and Dickens, 2012). The dampening of the magnitude of change in marine carbonates has been attributed to dissolution and carbonate chemistry changes during the peak of the hyperthermal (e.g. PETM). The enhanced terrestrial signal has been attributed to changes in soil conditions, humidity, plant communities and physiology, and an increase in the organic  $^{13}\text{C}$  fraction (Bowen et al., 2004; Tipple et al., 2011; Sluijs and Dickens, 2012).

295 Although the interval with low carbonate content prevented the generation of a more detailed foraminiferal isotope record, the covariance between bulk carbonate and benthic foraminiferal  $\delta^{13}\text{C}$  throughout combined with the biostratigraphy and magnetostratigraphy confirms our interpretation of the carbon isotope stratigraphy. The onset of the PETM in the mid-Atlantic region is characterized by a clay or low carbonate layer which has been attributed to both coastal acidification and enhanced siliciclastic sediment fluxes that are climatically driven (Bralower et al., 2018; Gibson et al., 2000; Kopp et al., 2009). High-  
 300 resolution climate simulations are consistent with enhanced seasonal or peak precipitation, which likely increased rates of erosion and sedimentation (Carmichael et al., 2017; Rush et al., 2021). Similarly, there are two potential explanations for the low carbonate interval associated with the body of ETM2: coastal acidification and enhanced siliciclastic flux. Coastal acidification would dissolve carbonate directly, leading to the low carbonate interval. It is unlikely that elevated  $\text{CO}_2$  levels alone could drive this given the rates of estimated C emissions (e.g., Harper et al., 2020). It is possible that this effect could be  
 305 enhanced by increased oxidation of organic matter, both in situ and transported into the shelf (Bralower et al., 2018; Lyons et al., 2019). Enhanced siliciclastic transport, is likely the main cause but to a much lesser extent with an estimated 50-100% increase in supply rates during ETM2, as compared to estimates of 2.8 to 220-fold increases with the PETM (Stassen et al., 2012b). Although, recent studies have suggested much more moderate increases in sedimentation rates, which is in good agreement with observations here (Li et al., 2022).

310 Although the coarse resolution of the carbon isotope stratigraphy might not capture a brief increase in sedimentation rates, our age model indicates sedimentation rates remained fairly constant across ETM2 and H2, in contrast to the PETM. Assuming



continuous sedimentation, rates range from 4.6 to 10.8 cm/kyr, with the ~~lower section~~ of the core trending lower and the upper section of the studied interval trending higher with an inflection point at 91.8 m. The lowest ~~rates~~ occurred prior to ETM2, and the highest occurred during the background state between ETM2 and H2 (Figure 6). However, sedimentation rates in shelf  
 315 settings can vary on timescales shorter than the resolution of our age model is able to detect. It is almost certain that the records reflect amalgamation of periods of enhanced sedimentation and non-deposition (Trampush and Hajek, 2017). Abrupt transitions within the distribution patterns of several dinocyst species suggest minor disconformities, condensed intervals, or depositional hiatuses that would result in highly variable sedimentation rates we cannot record based on the resolution of our carbon isotope age model. Therefore, the age model should be seen as capturing the average over long time periods.

320 The sedimentation rates predicted based upon the age model are largely consistent with those calculated based on spectral analysis, which found long-term average sedimentation rates on the order of 5 cm/kyr in the lower section of the core and 13 cm/kyr in the upper section, with an inflection point at the same location as predicted by the age model at ~92 m (Figure 4). Based on spectral characteristics the lower section of the core exhibits cyclicity that could be orbitally paced, while the upper section does not. This is unsurprising given the generally discontinuous or episodic nature of sediment accumulation in such  
 325 facies. Despite the aforementioned issues surrounding the stochastic nature of shelf deposition, cyclostratigraphic methods have been used in calculating shelf sedimentation rates for the PETM in the region, and the general agreement between the carbon isotope record and the spectral analysis suggests the general interpretation of a bimodal sedimentation pattern is accurate (Li et al., 2022).

Other factors may have a role in observed sedimentation rates, such as the paleobathymetry and local sea level. Faulting within  
 330 the region could have led to the development of horst and graben complexes (Supplement Figure 1). These positive and negative structural features could produce localized paleobathymetric highs and lows that could have influenced the observed variation in local sedimentation rates (Sabat 1977; Self-Trail et al., 2017a).

#### 4.2 Regional Hydrology and Depositional Setting

Evidence supporting a modest intensification of the hydrologic cycle includes the shift in clay mineralogy from smectite-  
 335 dominated facies to illite-dominated facies during the body of ETM2, as well as a moderate increase in illite prior to H2, with no detectable levels of kaolinite. Clay mineralogy is used extensively as a proxy for chemical weathering, with a spectrum from smectite to illite to kaolinite being associated with increasingly wet and warm conditions (Singer, 1980). Many locations experience a dramatic increase in kaolinite during the PETM (Robert and Kennett, 1994; Gibson et al, 2000; Kemp et al., 2016; Chen et al., 2016). Previous studies on clay mineralogy over the PETM in the Salisbury Embayment demonstrated that kaolinite  
 340 increased, and that this increase could have resulted from the reworking of older deposits (Gibson 2000; John et al., 2012). In other regions, the increase in kaolinite is believed to result from an authigenic weathering response to the PETM (Clechenko et al., 2007; Chen et al., 2016). Work on the radioisotopes of the clay minerals, namely strontium and lead, demonstrate little



change in the sourcing of sediment in the Atlantic coastal plain during the PETM and work on lithium isotopes seems to suggest rapid changes to global weathering patterns during the PETM (Rush et al, unpub. data; Pogge von Strandmann et al., 2021; Ramos et al., 2022). Since illite is a product of weathering between smectite and kaolinite, alongside recent studies demonstrating an immediate weathering response during the PETM, its presence seems support the interpretation that the clays formed in situ during ETM2. As the warming of ETM2 is intermediate to that of the background state and the PETM, the environmental perturbations during ETM2 would likely illicit a weathering response intermediate to the background state and that of the PETM.

The palynological assemblages imply a complicated story. The assemblages are typical of those seen in neritic settings (Pross and Brinkhuis, 2005; Frieling and Sluijs, 2018). They show a large degree of variability in fresh-water run-off, stratification and productivity, but the majority of these changes shows no relation to  $\delta^{13}\text{C}$  or temperature change, atypical for dinocysts (Figure 5).

An overall shallowing trend in the upper section of the core may be inferred based on a long-term decline in the abundance of the low-salinity-tolerant *Senegalinium* complex and a rise of the Goniodomids, which typically occur in massive (harmful) blooms in (seasonally) high salinity, warm, lagoonal conditions in modern and ancient settings (Zonneveld et al., 2013; Frieling and Sluijs, 2018; Sluijs et al., 2018). This shallowing trend also indicates a shift from brackish conditions to more saline conditions upsection that do not necessarily correspond to hyperthermal events and may indicate an overall longer-term trend.

Increased abundances of the low-salinity-tolerant *Senegalinium* complex and the supply of terrestrial palynomorphs suggest increased river run off in shelf sections across hyperthermal events (e.g., Crouch et al., 2003; Sluijs and Brinkhuis, 2009; Sluijs et al., 2009). These abundances in Knapps Narrows show no correspondence to the CIEs or temperature anomalies. The complex was abundant before, during and after ETM2 but was not present during H2 after its gradual decline, which does not support a strong hydrological response to this event. Terrestrial palynomorphs are rare throughout the record, reminiscent of the Upper Paleocene and Lower Eocene of the New Jersey Shelf (e.g., Zachos et al., 2006). This suggests changes in transport of terrestrial palynomorphs, or that the hinterland was sparsely vegetated in the region, also explaining the lack of response during the PETM, ETM2 and H2 (Self-Trail et al., 2017b). This may be consistent with the paleolatitude of about 33°N (paleolatitude.org version 2.1; van Hinsbergen et al., 2015), which arguably would represent an arid zone.

Goniodomids reach a maximum at H2 that also corresponds to the highest reconstructed temperatures. A rise in salinity seems to precede this warming but it should be noted that dinoflagellate blooms are strongly seasonal and therefore should not necessarily correspond to our salinity estimates. The correspondence of Goniodomid abundances with transient global warming events has been previously recorded, for example in brief intervals of the PETM on the New Jersey Shelf, the Nigerian Shelf, and across the Middle Eocene climatic optimum in the eastern equatorial Atlantic ((Sluijs and Brinkhuis, 2009; Frieling et al., 2017; Cramwinckel et al., 2019). Very high stable carbon isotope ratios suggest these Goniodomid abundances indicate

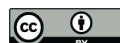

that at least some of these abundances represent an increase in the geographical range and frequency of harmful blooms  
 375 (Frieling et al., 2017; Sluijs et al., 2018).

In contrast to the records here, the Lomonosov Ridge palynological assemblages demonstrate a marked shift during ETM2, with an increase in dinoflagellate markers indicative of freshening and eutrophication, and the appearance of palm pollen indicating high winter temperatures (Sluijs et al., 2009; Willard et al., 2019). Further evidence of hydrologic changes is noted in hydrogen isotope records of leaf wax n-alkanes, which demonstrate a large rise during the PETM, a rise prior to ETM2, and  
 380 a drop during the body of the event as well as during H2 (Pagani et al., 2006; Krishnan et al., 2014).

Looking at other trackers of hydrologic changes across hyperthermals, records of enhanced siliciclastic flux were archived at Mead and Dee Streams in New Zealand across several hyperthermal events (Nicolo et al., 2007; Slotnick et al., 2012). While focused more on biotic and ocean chemistry conditions, the Nile Basin is also interpreted as having a similar response to the PETM but on a smaller scale (Stassen et al., 2012a). Such evidence of enhanced hydrology driving siliciclastic fluxes is also  
 385 found in hemipelagic sections such as the Terche section of northeastern Italy (D'Onofrio et al., 2016).

The records from continental sections suggest changes in the regional precipitation patterns were not entirely uniform. An increase in siliciclastic sediment flux in a terrestrial section at Ellesmere Island is interpreted as evidence of an intensified hydrologic system during ETM2 (Reinhardt et al., 2022). The Bighorn Basin record suggests contrasting regional climatic changes between the PETM and later hyperthermal events (Abels et al., 2016), in line with observations from this study.

The overall hydrologic response to ETM2 appears much more modest than that of the PETM, and somewhat muted given the scale of global warming and assuming a roughly linear response of precipitation patterns to global warming. Given that the baseline temperature prior to ETM2 is a few degrees higher than prior to the PETM, it is possible that sensitivity to an equivalent temperature perturbation would be less extreme than for the PETM, i.e. a state dependent response. This also suggests variability in hydroclimate responses to greenhouse forcing in different regions. While the Arctic records demonstrate  
 390 a strong hydrological response across ETM2, here the interpretation is less straightforward (Sluijs et al., 2009). Depending on the region, local hydroclimate seems to respond in a somewhat non-linear fashion to global warming, characterized more by abrupt mode shifts (e.g., frequency of extremes, or duration of wet vs. dry seasons) as opposed to gradational changes (e.g., mean annual precipitation). In the mid-Atlantic region, our palynological record appears to confirm this overall 'mild' response to the ETM2. In effect, to record only minor changes is rather unique, given that other transient climatic events in the Cenozoic  
 395 are typically characterized by massive concomitant dinocyst assemblage changes.  
 400

#### 4.5 Temperature

There is broad correspondence between temperature variability derived from TEX<sub>86</sub> and  $\delta^{18}\text{O}$ , suggesting the trends are accurate. TEX<sub>86</sub> records indicate minor variations with a rise of 1°C prior to ETM2, a drop of 1°C relative to the baseline

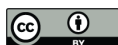

during the body, and an increase of 1.3°C during H2. The magnitude of these shifts is much lower than those of the PETM at  
 405 nearby sites, with paleotemperature reconstructions from the PETM derived from TEX<sub>86</sub> and δ<sup>18</sup>O at other sections in the  
 region suggesting 5–8 °C surface warming without much scatter (Sluijs et al., 2007; Zachos et al., 2006; Babila et al., 2022).  
 The elevated temperatures prior to the CIE associated with ETM2 are followed by a drop in temperatures during the event.  
 There are multiple potential explanations for the apparent lack of correspondence between the CIEs and temperature variability.  
 In shelf settings, deposition is generally discontinuous and variable, particularly during periods of dramatic climatic changes  
 410 such as Eocene hyperthermals (Trampush and Hajek, 2017). This has the potential to introduce preservation and sampling  
 biases within the sedimentary record, and given the coarse resolution of the temperature records, the possibility of not capturing  
 a warming anomaly that lasted only a few tens of thousands of years. Another possibility is the contribution of regional scale  
 changes resulting from changing ocean and atmospheric circulation patterns in a modestly warmer world. With the current  
 warming, changes to the Atlantic Meridional Ocean Circulation results in regionally lower temperatures in the North Atlantic  
 415 (Jackson et al., 2015). Another factor to consider is orbital forcing. The Eocene hyperthermals appear to coincide with 400-  
 kyr eccentricity maxima (Lourens et al., 2005; Zachos et al., 2010). Although the lower frequency cyclical changes in CO<sub>2</sub>  
 appear to be paced by eccentricity (Zeebe et al., 2017; Vervoort et al., 2021), depending on the phase of precession, local  
 temperature, particularly on or near land, could deviate from global patterns (Kiehl et al., 2018). This effect would be further  
 exaggerated if local sediment deposition tended to be biased toward one phase. The variation in responses between various  
 420 proxy systems and muted responses relative to the PETM highlights the nonlinearity of the climate system to CO<sub>2</sub> forcing and  
 demonstrates the importance of considering additional forcings.

The ETM2 has already been documented in numerous pelagic sections, which uniformly demonstrate 2–4°C of warming during  
 the event (Harper et al., 2018). The uniformity observed in open ocean sections is mirrored in previously documented shelf  
 sections. The central Lomonosov Ridge has been argued to have experienced an increase in warm, wet conditions during  
 425 ETM2, similar to reconstructions for the PETM (Sluijs et al., 2009; Sluijs et al., 2020). TEX<sub>86</sub> records for this site indicate a  
 warming on the order of 3–5°C.

## 5. Conclusions

This study provides the first documentation of ETM2 and H2 in the Salisbury Embayment of the mid-Atlantic Coastal Plain.  
 Clay mineralogy, δ<sup>18</sup>O, and TEX<sub>86</sub> records portray climate perturbations across this interval. The shift in clay mineralogy from  
 430 smectite to illite taken in the context of kaolinite dominated facies during the preceding PETM suggests the clay mineralogy  
 changes are authigenic and represent an intermediate stage of weathering relative to the PETM and the background state  
 resulting from an enhanced hydrologic cycle. Temperature proxies show minor increases in temperature that appear  
 asynchronous with changes to the carbon cycle and may represent alternative forcings such as changes in ocean and  
 atmospheric circulation or orbital forcing or a potential sampling artifact. Dinocyst assemblages demonstrate little response to



435 the short-lived hyperthermals and point more towards being dominated by long-term trends. Similarly, sedimentation rates also appear to be dominated by long term trends, occurring in a bimodal fashion with the transition between the states having no correlation to either of the hyperthermals. When compared to the PETM and other records of ETM2, these contrasting records demonstrate the complexities of climatic changes and regional variability associated with rapid warming events, highlighting the need for extensive spatial coverage to interpret climatic changes. In essence, the local  $\Delta$ precipitation did not  
440 scale linearly with the  $\Delta$ temperature. The relatively muted signal in this region compared to the PETM may be due in part to the warmer baseline state prior to ETM2 compared to the PETM. Future research into high-resolution climate models of these smaller scale hyperthermal events may assist in interpretation of this record as well as records in different regions.

## 6. Data Availability

All data is available via the Pangaea repository (doi pending)

## 445 7. Sample Availability

Samples are available upon request from the Florence Bascom Geoscience Center of the United States Geological Survey.

## 8. Author Contributions

Manuscript was prepared by WR, with contributions from all co-authors. Stable isotope measurements, clay mineralogy, carbonate content, age model, and data synthesis were performed by WR. Coring and sampling was performed by JS and MR.  
450 Paleomagnetic work and spectral analysis were performed by YZ. Nannofossil biostratigraphy was performed by JS. TEX<sub>86</sub> measurements were performed by AS. Palynology was performed by HB. Project oversight and mentoring was provided by JZ.

## 9. Competing interests

The authors declare that they have no conflict of interest.

## 455 10. Disclaimer

Any use of trade, firm, or product names is for descriptive purposes only and does not imply endorsement by the U.S. Government.



## 11. Acknowledgements

Funding for this project was provided by NSF OCE-1415958, OCE-1658017, and OCE-2103513. We thank Antoinette van den Dikkenberg, Giovanni Dammers and Natasja Welters (Utrecht University) for analytical and technical assistance. AS thanks the European Research Council for Consolidator Grant #771497 (SPANC). Core collection and MMR were funded by the USGS Climate Research and Development Program. JST was funded by the USGS National Cooperative Geologic Mapping Program. YZ and paleomagnetic work was funded by the Geologic Timescale Foundation.

## References

- Abels, H.A., Lauretano, V., van Yperen, A., Hopman, T., Zachos, J.C., Lourens, L.J., Gingerich, P.D. and Bowen, G.J.: Carbon isotope excursions in paleosol carbonate marking five Early Eocene hyperthermals in the Bighorn Basin, Wyoming. *Clim. Past Discuss*, 11, 1857-1885. doi:10.5194/cpd-11-1857-201, 2015.
- Abels, H.A., Lauretano, V., Van Yperen, A.E., Hopman, T., Zachos, J.C., Lourens, L.J., Gingerich, P.D. and Bowen, G.J.: Environmental impact and magnitude of paleosol carbonate carbon isotope excursions marking five early Eocene hyperthermals in the Bighorn Basin, Wyoming. *Climate of the Past*, 12(5), 1151-1163. doi:10.5194/cp-12-1151-2016
- Agnini, C., Fornaciari, E., Raffi, I., Catanzariti, R., Palike, H., Backman, J., and Rio, D., 2014, Biozonation and biochronology of Paleogene calcareous nannofossils from low and middle latitudes. *Newsletters on Stratigraphy*, 47 (2), 131-181. doi:10.1127/0078-0421/2014/0042, 2016.
- Babila, T.L., Penman, D.E., Standish, C.D., Doubrava, M., Bralower, T.J., Robinson, M.M., Self-Trail, J.M., Speijer, R.P., Stassen, P., Foster, G.L. and Zachos, J.C.: Surface ocean warming and acidification driven by rapid carbon release precedes Paleocene-Eocene Thermal Maximum. *Science advances*, 8(11), p.eabg1025. doi: 10.1126/sciadv.abg1025, 2022.
- Baxter, A.J., Hopmans, E.C., Russell, J.M. and Damsté, J.S.S.: Bacterial GMGTs in East African lake sediments: Their potential as palaeotemperature indicators. *Geochimica et Cosmochimica Acta*, 259, 155-169. doi:10.1016/j.gca.2019.
- Bijl, P.K., Brinkhuis, H., Egger, L.M., Eldrett, J.S., Frieling, J., Grothe, A., Houben, A.J., Pross, J., Śliwińska, K.K. and Sluijs, A.: Comment on ‘Wetzeliella and its allies—the ‘hole’ story: a taxonomic revision of the Paleogene dinoflagellate subfamily Wetzelielloideae’ by Williams et al. (2015). *Palynology*, 41(3), 423-429. doi:10.1080/01916122.2016.1235056, 2017.
- Blair, S.A. and Watkins, D.K.: High-resolution calcareous nannofossil biostratigraphy for the Coniacian/Santonian Stage boundary, Western Interior Basin. *Cretaceous Research*, 30, 367-384. doi:10.1016/j.cretres.2008.07.016, 2009.
- Blaga, C.I., Reichert, G.J., Heiri, O. and Sinningh Damsté, J.S.: Tetraether membrane lipid distributions in water-column particulate matter and sediments: a study of 47 European lakes along a north–south transect. *Journal of Paleolimnology*, 41(3), pp.523-540, doi: 10.1007/s10933-008-9242-2, 2009.





- Bowen, G.J., Beerling, D.J., Koch, P.L., Zachos, J.C. and Quattlebaum, T.: A humid climate state during the Palaeocene/Eocene thermal maximum. *Nature*, 432(7016), 495-499. doi:10.1038/nature03115, 2004.
- 490 Bown, P. and Young, J.R.: Techniques. In: P.R. Bown, Ed., *Calcareous Nannofossil Biostratigraphy*, 16-28. Cambridge: Kluwer Academic Press, 1998.
- Bralower, T.J., Kump, L.R., Self-Trail, J.M., Robinson, M.M., Lyons, S., Babila, T., Ballaron, E., Freeman, K.H., Hajek, E., Rush, W. and Zachos, J.C.: Evidence for shelf acidification during the onset of the Paleocene-Eocene thermal maximum. *Paleoceanography and Paleoclimatology*, 33(12), 1408-1426. doi:10.1029/2018PA003382, 2018.
- 495 Brinkhuis, H., Schouten, S., Collinson, M.E., Sluijs, A., Damsté, J.S.S., Dickens, G.R., Huber, M., Cronin, T.M., Onodera, J., Takahashi, K. and Bujak, J.P.: Episodic fresh surface waters in the Eocene Arctic Ocean. *Nature*, 441(7093), 606-609. doi:10.1038/nature04692, 2006.
- Carmichael, M.J., Inglis, G.N., Badger, M.P., Naafs, B.D.A., Behrooz, L., Rimmelzwaal, S., Monteiro, F.M., Rohrsen, M., Farnsworth, A., Buss, H.L. and Dickson, A.J.: Hydrological and associated biogeochemical consequences of rapid global warming during the Paleocene-Eocene Thermal Maximum. *Global and Planetary Change*, 157, 114-138. doi:10.1016/j.gloplacha.2017.07.014, 2017.
- 500 Chen, Z., Ding, Z., Yang, S., Zhang, C. and Wang, X.: Increased precipitation and weathering across the Paleocene-Eocene Thermal Maximum in central China. *Geochemistry, Geophysics, Geosystems*, 17(6), 2286-2297. doi:10.1002/2016GC006333, 2016.
- 505 Clechenko, E.R., Kelly, D.C., Harrington, G.J. and Stiles, C.A.: Terrestrial records of a regional weathering profile at the Paleocene-Eocene boundary in the Williston Basin of North Dakota. *Geological Society of America Bulletin*, 119(3-4), 428-442. doi:10.1130/B26010.1, 2007.
- Cramer, B.S., Wright, J.D., Kent, D.V. and Aubry, M.P.: Orbital climate forcing of  $\delta^{13}\text{C}$  excursions in the late Paleocene–early Eocene (chrons C24n–C25n). *Paleoceanography*, 18(4). doi:10.1029/2003PA000909, 2003.
- 510 Cramwinckel, M. J., van der Ploeg, R., Bijl, P. K., Peterse, F., Bohaty, S. M., Röhl, U., Schouten, S., Middelburg, J. J., and Sluijs, A.: Harmful algae and export production collapse in the equatorial Atlantic during the zenith of Middle Eocene Climatic Optimum warmth, *Geology*, doi:10.1130/G45614.1, 2019.
- Crouch, E. M., Dickens, G. R., Brinkhuis, H., Aubry, M.-P., Hollis, C. J., Rogers, K. M., and Visscher, H.: The Apectodinium acme and terrestrial discharge during the Paleocene-Eocene thermal maximum: new palynological, geochemical and calcareous nannoplankton observations at Tawanui, New Zealand, *Palaeogeography, Palaeoclimatology, Palaeoecology*, 194, 387-403 doi:10.1016/S0031-0182(03)00334-1, 2003.
- 515 Dickens, G. R., Castillo, M. M., and Walker, J. C.: A blast of gas in the latest Paleocene: Simulating first-order effects of massive dissociation of oceanic methane hydrate. *Geology*, 25(3), 259-262. doi:10.1130/0091-7613(1997)025%3C0259:ABOGIT%3E2.3.CO;2, 1997.



- 520 D'Onofrio, R., Luciani, V., Fornaciari, E., Giusberti, L., Boscolo Galazzo, F., Dallanave, E., Westerhold, T., Sprovieri, M. and  
 Telch, S.: Environmental perturbations at the early Eocene ETM2, H2, and I1 events as inferred by Tethyan calcareous  
 plankton (Terche section, northeastern Italy). *Paleoceanography*, 31(9), 1225-1247. doi:10.1002/2016PA002940, 2016.  
 Fairbanks, R.G.: The origin of continental shelf and slope water in the New York Bight and Gulf of Maine: evidence from H2  
 18O/H2 16O ratio measurements. *Journal of Geophysical Research: Oceans*, 87(C8), 5796-5808.  
 525 doi:10.1029/JC087iC08p057961, 1982.  
 Dunkley Jones, T., Lunt, D.J., Schmidt, D.N., Ridgwell, A., Sluijs, A., Valdes, P.J. and Maslin, M.: Climate model and proxy  
 data constraints on ocean warming across the Paleocene–Eocene Thermal Maximum. *Earth-Science Reviews*, 125, pp.123-  
 145. doi:10.1016/j.earscirev.2013.07.004, 2013.  
 Frieling, J., Gebhardt, H., Huber, M., Adekeye, O. A., Akande, S. O., Reichart, G.-J., Middelburg, J. J., Schouten, S., and  
 530 Sluijs, A.: Extreme warmth and heat-stressed plankton in the tropics during the Paleocene-Eocene Thermal Maximum, *Science*  
*Advances*, 3, e1600891, doi:10.1126/sciadv.1600891, 2017.  
 Frieling, J., Peterse, F., Lunt, D.J., Bohaty, S.M., Sinninghe Damsté, J.S., Reichart, G.J. and Sluijs, A.: Widespread warming  
 before and elevated barium burial during the Paleocene-Eocene Thermal Maximum: Evidence for methane hydrate release?.  
*Paleoceanography and paleoclimatology*, 34(4), 546-566, 2019.  
 535 Frieling, J. and Sluijs, A.: Towards quantitative environmental reconstructions from ancient non-analogue microfossil  
 assemblages: Ecological preferences of Paleocene–Eocene dinoflagellates. *Earth-Science Reviews*, 185, 956-973.  
 doi:10.1016/j.earscirev.2018.08.014, 2018.  
 Gibson, T.G., Bybell, L.M., Mason, D.B.: Stratigraphic and climatic implications of clay mineral changes around the  
 Paleocene/Eocene boundary of the northeastern US margin. *Sedimentary Geology*, 134(1-2), 65-92. doi:10.1016/S0037-  
 540 0738(00)00014-2, 2000.  
 Gradstein, F.M., Ogg, J.G., Schmitz, M.D., and Ogg, G.M., 2020. *Geologic Time Scale 202*, Elsevier, 2020.  
 Gutjahr, M., Ridgwell, A., Sexton, P. F., Anagnostou, E., Pearson, P. N., Pälike, H., Norris, R.D., Thomas, E., Foster, G.L.:  
 Very large release of mostly volcanic carbon during the Palaeocene–Eocene Thermal Maximum. *Nature* 548(7669), 573-577.  
 doi:10.1038/nature23646, 2017.  
 545 Harding, I.C., Charles, A.J., Marshall, J.E., Pälike, H., Roberts, A.P., Wilson, P.A., Jarvis, E., Thorne, R., Morris, E.,  
 Moremon, R. and Pearce, R.B.: Sea-level and salinity fluctuations during the Paleocene–Eocene thermal maximum in Arctic  
 Spitsbergen. *Earth and Planetary Science Letters*, 303(1-2), pp.97-107. doi:10.1016/j.epsl.2010.12.043, 2011.  
 Harper, D. T., Hönsch, B., Zeebe, R. E., Shaffer, G., Haynes, L. L., Thomas, E., and Zachos, J. C.: The magnitude of surface  
 ocean acidification and carbon release during Eocene Thermal Maximum 2 (ETM-2) and the Paleocene-Eocene Thermal  
 550 Maximum (PETM). *Paleoceanography and Paleoclimatology*, 35(2), e2019PA003699. doi:10.1029/2019PA003699, 2020.  
 Harper, D.T., Zeebe, R., Hönsch, B., Schrader, C.D., Lourens, L.J. and Zachos, J.C.: Subtropical sea-surface warming and  
 increased salinity during Eocene Thermal Maximum 2. *Geology*, 46(2), 187-190. doi:10.1130/G39658.1, 2018.



- Ho, S. L. and Laepple, T.: Flat meridional temperature gradient in the early Eocene in the subsurface rather than surface ocean, *Nature Geoscience*, 9(August), doi:10.1038/ngeo2763, 2016.
- 555 Hollis, C.J., Dunkley Jones, T., Anagnostou, E., Bijl, P.K., Cramwinckel, M.J., Cui, Y., Dickens, G.R., Edgar, K.M., Eley, Y., Evans, D. and Foster, G.L.: The DeepMIP contribution to PMIP4: methodologies for selection, compilation and analysis of latest Paleocene and early Eocene climate proxy data, incorporating version 0.1 of the DeepMIP database. *Geoscientific Model Development*, 12(7), 3149-3206. doi:10.5194/gmd-12-3149-2019, 2019.
- Hopmans, E.C., Weijers, J.W., Schefuß, E., Herfort, L., Damsté, J.S.S. and Schouten, S.: A novel proxy for terrestrial organic  
 560 matter in sediments based on branched and isoprenoid tetraether lipids. *Earth and Planetary Science Letters*, 224(1-2), pp.107-116, doi: 10.1016/j.epsl.2004.05.012, 2004.
- Hurley, S. J., Lipp, J. S., Close, H. G., Hinrichs, K. U. and Pearson, A.: Distribution and export of isoprenoid tetraether lipids in suspended particulate matter from the water column of the Western Atlantic Ocean, *Organic Geochemistry*, 116, 90–102, doi:10.1016/j.orggeochem.2017.11.010, 2018.
- 565 Jackson, L.C., Kahana, R., Graham, T., Ringer, M.A., Woollings, T., Mecking, J.V. and Wood, R.A.: Global and European climate impacts of a slowdown of the AMOC in a high resolution GCM. *Climate dynamics*, 45(11), 3299-3316. doi:10.1007/s00382-015-2540-2, 2015.
- Jiang, J., Hu, X., Li, J., BouDagher-Fadel, M., and Garzanti, E.: Discovery of the Paleocene-Eocene Thermal Maximum in shallow-marine sediments of the Xigaze forearc basin, Tibet: A record of enhanced extreme precipitation and siliciclastic  
 570 sediment flux. *Palaeogeography, Palaeoclimatology, Palaeoecology*, 562, 110095. doi:10.1016/j.palaeo.2020.110095, 2021.
- Jin, S., Kemp, D.B., Jolley, D.W., Vieira, M., Zachos, J.C., Huang, C., Li, M. and Chen, W.: Large-scale, astronomically paced sediment input to the North Sea Basin during the Paleocene Eocene Thermal Maximum. *Earth and Planetary Science Letters*, 579, 117340. doi:10.1016/j.epsl.2021.117340, 2022.
- John, C.M., Bohaty, S.M., Zachos, J.C., Sluijs, A., Gibbs, S., Brinkhuis, H. and Bralower, T.J.: North American continental  
 575 margin records of the Paleocene-Eocene thermal maximum: Implications for global carbon and hydrological cycling. *Paleoceanography*, 23(2). doi:10.1029/2007PA001465, 2008.
- John, C. M., Banerjee, N. R., Longstaffe, F. J., Sica, C., Law, K. R., Zachos, J. C.: Clay assemblage and oxygen isotopic constraints on the weathering response to the Paleocene-Eocene thermal maximum, east coast of North America. *Geology*, 40(7), 591-594 doi:10.1130/G32785.1, 2012.
- 580 Kemp, S.J., Ellis, M.A., Mounteney, I. and Kender, S.: Palaeoclimatic implications of high-resolution clay mineral assemblages preceding and across the onset of the Palaeocene–Eocene Thermal Maximum, North Sea Basin. *Clay Minerals*, 51(5), 793-813. doi:10.1180/claymin.2016.051.5.08, 2016.
- Kodama, K.P., and Hinnov, L.: *Rock Magnetic Cyclostratigraphy*: John Wiley and Sons, 5, 165. doi:10.1002/9781118561294, 2015.



- 585 Kiehl, J.T., Shields, C.A., Snyder, M.A., Zachos, J.C. and Rothstein, M.: Greenhouse-and orbital-forced climate extremes during the early Eocene. *Philosophical Transactions of the Royal Society A: Mathematical, Physical and Engineering Sciences*, 376(2130), 20170085. doi:10.1098/rsta.2017.0085, 2018.
- Kim, J.H., Van der Meer, J., Schouten, S., Helmke, P., Willmott, V., Sangiorgi, F., Koç, N., Hopmans, E.C. and Damsté, J.S.S.: New indices and calibrations derived from the distribution of crenarchaeal isoprenoid tetraether lipids: Implications for  
 590 past sea surface temperature reconstructions. *Geochimica et Cosmochimica Acta*, 74(16), 4639-4654. doi:10.1016/j.gca.2010.05.027, 2010.
- Kopp, R.E., Schumann, D., Raub, T.D., Powars, D.S., Godfrey, L.V., Swanson-Hysell, N.L., Maloof, A.C. and Vali, H.: Appalachian Amazon? Magnetofossil evidence for the development of a tropical river-like system in the mid-Atlantic United States during the Paleocene-Eocene thermal maximum. *Paleoceanography*, 24(4). doi:10.1029/2009PA001783, 2009.
- 595 Krishnan, S., Pagani, M., Huber, M. and Sluijs, A.: High latitude hydrological changes during the Eocene Thermal Maximum 2. *Earth and Planetary Science Letters*, 404, 167-177. doi:10.1016/j.epsl.2014.07.029, 2014.
- Lauretano, V., Littler, K., Polling, M., Zachos, J.C. and Lourens, L.J.: Frequency, magnitude and character of hyperthermal events at the onset of the Early Eocene Climatic Optimum. *Climate of the Past*, 11(10), 1313-1324. doi:10.1029/2018PA003422, 2015.
- 600 Li, M.S., Bralower, T.J., Kump, L.R., Self-Trail, J.M., Zachos, J.C., Rush, W.D., and Robinson, M.M.: Astrochronology of the Paleocene-Eocene Thermal Maximum on the Atlantic Coastal Plain. *Nature Communications*, 13, 5618. doi: 10.1038/s41467-022-33390-x, 2022.
- Li, M.S., Kump, L., Hinnov, L.A., and Mann, M.: Tracking variable sedimentation rates and astronomical forcing in Phanerozoic paleoclimate proxy series with evolutionary correlation coefficients and hypothesis testing. *Earth and Planetary  
 605 Science Letters*, 501, 165-179. doi: <https://doi.org/10.1016/j.epsl.2018.08.041>, 2018
- Li, M.S., Hinnov, L., Kump L.: *Acycle*: Time-series analysis software for paleoclimate projects and education. *Computers and Geosciences*, 127, 12-22. doi: <https://doi.org/10.1016/j.cageo.2019.02.011>, 2019.
- Littler, K., Röhl, U., Westerhold, T., Zachos, J.C.: A high-resolution benthic stable-isotope record for the South Atlantic: Implications for orbital-scale changes in Late Paleocene–Early Eocene climate and carbon cycling. *Earth and Planetary Science  
 610 Letters*, 401, 18-30. doi:10.1016/j.epsl.2014.05.054, 2014.
- Lourens, L.J., Sluijs, A., Kroon, D., Zachos, J.C., Thomas, E., Röhl, U., Bowles, J. and Raffi, I.: Astronomical pacing of late Palaeocene to early Eocene global warming events. *Nature*, 435(7045), 1083-1087. doi:10.1038/nature03814, 2005.
- Marchitto, T.M., Curry, W.B., Lynch-Stieglitz, J., Bryan, S.P., Cobb, K.M. and Lund, D.C.: Improved oxygen isotope temperature calibrations for cosmopolitan benthic foraminifera. *Geochimica et Cosmochimica Acta*, 130, 1-11.  
 615 doi:10.1016/j.gca.2013.12.034, 2014.
- Lyons, S.L., Baczynski, A.A., Babila, T.L., Bralower, T.J., Hajek, E.A., Kump, L.R., Polites, E.G., Self-Trail, J.M., Trampush, S.M., Vornlocher, J.R. and Zachos, J.C.: Palaeocene–Eocene thermal maximum prolonged by fossil carbon oxidation. *Nature Geoscience*, 12(1), pp.54-60. doi: 10.1038/s41561-018-0277-3, 2019.



- Martini, W.: Standard Tertiary and Quaternary calcareous nannoplankton zonation. In: Farinacci, A., Ed., Proceedings of the  
 620 2nd Planktonic Conference, Roma, 2: 739-785, 1971.
- Masson-Delmotte, V., P. Zhai, A. Pirani, S.L. Connors, C. Péan, S. Berger, N. Caud, Y. Chen, L. Goldfarb, M.I. Gomis, M. Huang, K. Leitzell, E. Lonnoy, J.B.R. Matthews, T.K. Maycock, T. Waterfield, O. Yelekçi, R. Yu, and Zhou, B.: IPCC, 2021: Climate Change 2021: The Physical Science Basis. Contribution of Working Group I to the Sixth Assessment Report of the Intergovernmental Panel on Climate Change. Cambridge University Press. In Press, 2021.
- 625 Miller, K.G., Kominz, M.A., Browning, J.V., Wright, J.D., Mountain, G.S., Katz, M.E., Sugarman, P.J., Cramer, B.S., Christie-Blick, N. and Pekar, S.F.: The Phanerozoic record of global sea-level change. *science*, 310(5752), 1293-1298. doi:10.1126/science.1116412, 2005.
- Naafs, B.D.A., Rohrsen, M., Inglis, G.N., Lähteenoja, O., Feakins, S.J., Collinson, M.E., Kennedy, E.M., Singh, P.K., Singh, M.P., Lunt, D.J. and Pancost, R.D.: High temperatures in the terrestrial mid-latitudes during the early Palaeogene. *Nature*  
 630 *Geoscience*, 11(10), 766-771. doi:10.1038/s41561-018-0199-0, 2018.
- Nicolo, M.J., Dickens, G.R., Hollis, C.J. and Zachos, J.C.: Multiple early Eocene hyperthermals: Their sedimentary expression on the New Zealand continental margin and in the deep sea. *Geology*, 35(8), 699-702. doi:10.1130/G23648A.1, 2007.
- O'Brien, C.L., Robinson, S.A., Pancost, R.D., Damsté, J.S.S., Schouten, S., Lunt, D.J., Alsenz, H., Bornemann, A., Bottini, C., Brassell, S.C. and Farnsworth, A.: Cretaceous sea-surface temperature evolution: Constraints from TEX86 and planktonic  
 635 foraminiferal oxygen isotopes. *Earth-Science Reviews*, 172, 224-247. doi:10.1016/j.earscirev.2017.07.012, 2017.
- Pagani, M., Pedentchouk, N., Huber, M., Sluijs, A., Schouten, S., Brinkhuis, H., Sinninghe Damsté, J.S. and Dickens, G.R.: Arctic hydrology during global warming at the Palaeocene/Eocene thermal maximum. *Nature*, 442(7103), pp.671-675. doi:10.1038/nature05043, 2006.
- Penman, D.E., Hönisch, B., Zeebe, R.E., Thomas, E. and Zachos, J.C.: Rapid and sustained surface ocean acidification during  
 640 the Paleocene-Eocene Thermal Maximum. *Paleoceanography*, 29(5), pp.357-369. doi:10.1002/2014PA002621, 2014.
- Pfahl, S., O'Gorman, P.A. and Fischer, E.M.: Understanding the regional pattern of projected future changes in extreme precipitation. *Nature Climate Change*, 7(6), 423-427. doi:10.1038/nclimate3287, 2017.
- Pogge von Strandmann, P.A., Jones, M.T., West, A.J., Murphy, M.J., Stokke, E.W., Tarbuck, G., Wilson, D.J., Pearce, C.R. and Schmidt, D.N.: Lithium isotope evidence for enhanced weathering and erosion during the Paleocene-Eocene Thermal  
 645 Maximum. *Science advances*, 7(42), p.eabh4224. doi:10.1126/sciadv.abh4224, 2021.
- Poppe, L.J., Paskevich, V.F., Hathaway, J.C. and Blackwood, D.S.: A laboratory manual for X-ray powder diffraction. US Geological Survey open-file report, 1(041), 1-88, 2001.
- Pross, J. and Brinkhuis, H.: Organic-walled dinoflagellate cysts as paleoenvironmental indicators in the Paleogene; a synopsis of concepts. *Paläontologische Zeitschrift*, 79(1), 53-59. doi:10.1007/BF03021753, 2005.
- 650 Ramos, E.J., Breecker, D.O., Barnes, J.D., Li, F., Gingerich, P.D., Loewy, S.L., Satkoski, A.M., Baczynski, A.A., Wing, S.L., Miller, N.R. and Lassiter, J.C.: Swift Weathering Response on Floodplains During the Paleocene-Eocene Thermal Maximum. *Geophysical Research Letters*, 49(6), p.e2021GL097436. doi:10.1029/2021GL097436, 2022.



- Reichart, G.-J., and Brinkhuis, H.: Late Quaternary *Protoperidinium* cysts as indicators of paleoproductivity in the northern Arabian Sea. *Marine Micropaleontology*, 49 (4), 303-315. doi: 10.1016/S0377-8398(03)00050-1, 2003.
- 655 Reinhardt, L., von Gosen, W., Lückge, A., Blumenberg, M., Galloway, J.M., West, C.K., Sudermann, M. and Dolezych, M.: Geochemical indications for the Paleocene-Eocene Thermal Maximum (PETM) and Eocene Thermal Maximum 2 (ETM-2) hyperthermals in terrestrial sediments of the Canadian Arctic. *Geosphere*. doi:10.1130/GES02398.1, 2022.
- Reynolds, P., Planke, S., Millett, J. M., Jerram, D. A., Trulsvik, M., Schofield, N., and Myklebust, R.: Hydrothermal vent complexes offshore Northeast Greenland: A potential role in driving the PETM. *Earth and Planetary Science Letters*, 467, 72-78. doi:10.1016/j.epsl.2017.03.031, 2017.
- 660 Richaud, B., Kwon, Y.O., Joyce, T.M., Fratantoni, P.S. and Lentz, S.J.: Surface and bottom temperature and salinity climatology along the continental shelf off the Canadian and US East Coasts. *Continental Shelf Research*, 124, 165-181. doi:10.1016/j.csr.2016.06.005, 2016.
- Robert, C. and Kennett, J.P.: Antarctic subtropical humid episode at the Paleocene-Eocene boundary: Clay-mineral evidence. *Geology*, 22(3), 211-214. doi:10.1130/0091-7613(1994)022%3C0211:ASHEAT%3E2.3.CO;2, 1994.
- 665 Rush, W.D., Kiehl, J.T., Shields, C.A. and Zachos, J.C.: Increased frequency of extreme precipitation events in the North Atlantic during the PETM: Observations and theory. *Palaeogeography, Palaeoclimatology, Palaeoecology*, 568, 110289. doi:10.1016/j.palaeo.2021.110289, 2021.
- Sabat, M.A.: Gravity anomalies associated with the Salisbury embayment, Maryland–southern Delaware. *Geology*, 5(7), pp.433-436. doi:10.1130/0091-7613(1977)5<433:GAAWTS>2.0.CO;2, 1977.
- 670 Schmitz, B., and Pujalte, V.: Abrupt increase in seasonal extreme precipitation at the Paleocene-Eocene boundary. *Geology*, 35(3), 215-218. doi:10.1130/G23261A.1, 2007.
- Schouten, S., Hopmans, E.C. and Sinnighe Damsté, J.S.: The organic geochemistry of glycerol dialkyl glycerol tetraether lipids: A review. *Organic geochemistry*, 54, 19-61. doi:10.1016/j.orggeochem.2012.09.006, 2013.
- 675 Schouten, S., Hopmans, E.C., Schefuß, E. and Sinninghe Damsté, J.S.: Distributional variations in marine crenarchaeotal membrane lipids: a new tool for reconstructing ancient sea water temperatures?. *Earth and Planetary Science Letters*, 204(1-2), 265-274. doi:10.1016/S0012-821X(02)00979-2, 2002.
- Singer, A.: The paleoclimatic interpretation of clay minerals in soils and weathering profiles. *Earth-Science Reviews*, 15(4), 303-326. doi:10.1016/0012-8252(80)90113-0, 1980.
- 680 Self-Trail, J.M., Powars, D.S., Watkins, D.K. and Wandless, G.A.: Calcareous nannofossil assemblage changes across the Paleocene–Eocene Thermal Maximum: Evidence from a shelf setting. *Marine Micropaleontology*, 92, 61-80. doi:10.1016/j.marmicro.2012.05.003, 2012.
- Self-Trail, J.M., Powars, D.S., Zhang, Y., Ogg, J.G., and Fung, M.K.: A very (very) preliminary chronostratigraphic framework of an expanded and structurally controlled early Eocene section from the Knapps Narrows core, Salisbury Embayment, USA, CBEP 2017, UT, Sept. 3-8, p. 121. 2017a.
- 685



- Self-Trail, J.M., Robinson, M.M., Bralower, T.J., Sessa, J.A., Hajek, E.A., Kump, L.R., Trampush, S.M., Willard, D.A., Edwards, L.E., Powars, D.S. and Wandless, G.A.: Shallow marine response to global climate change during the Paleocene-Eocene Thermal Maximum, Salisbury Embayment, USA. *Paleoceanography*, 32(7), 710-728. doi:10.1002/2017PA003096, 2017b.
- 690 Slotnick, B.S., Dickens, G.R., Nicolo, M.J., Hollis, C.J., Crampton, J.S., Zachos, J.C. and Sluijs, A.: Large-amplitude variations in carbon cycling and terrestrial weathering during the latest Paleocene and earliest Eocene: The record at Mead Stream, New Zealand. *The Journal of Geology*, 120(5), 487-505. doi:10.1086/666743, 2012.
- Sluijs, A., Brinkhuis, H., Schouten, S., Bohaty, S.M., John, C.M., Zachos, J.C., Reichart, G.J., Sinninghe Damsté, J.S., Crouch, E.M. and Dickens, G.R.: Environmental precursors to rapid light carbon injection at the Palaeocene/Eocene boundary. *Nature*, 695 450(7173), 1218-1221. doi:10.1038/nature06400, 2007.
- Sluijs, A., and Brinkhuis, H.: A dynamic climate and ecosystem state during the Paleocene-Eocene Thermal Maximum: inferences from dinoflagellate cyst assemblages on the New Jersey Shelf. *Biogeosciences*, 6(8), 1755-1781. doi:10.5194/bg-6-1755-2009, 2009.
- Sluijs, A. and Dickens, G.R.: Assessing offsets between the  $\delta^{13}\text{C}$  of sedimentary components and the global exogenic carbon 700 pool across early Paleogene carbon cycle perturbations. *Global Biogeochemical Cycles*, 26(4). doi:10.1029/2011GB004224, 2012.
- Sluijs, A., Frieling, J., Inglis, G.N., Nierop, K.G., Peterse, F., Sangiorgi, F. and Schouten, S.: Late Paleocene–early Eocene Arctic Ocean sea surface temperatures: reassessing biomarker paleothermometry at Lomonosov Ridge. *Climate of the Past*, 16(6), pp.2381-2400. doi:10.5194/cp-16-2381-2020, 2020.
- 705 Sluijs, A., Pross, J. and Brinkhuis, H.: From greenhouse to icehouse; organic-walled dinoflagellate cysts as paleoenvironmental indicators in the Paleogene. *Earth-Science Reviews*, 68(3-4), 281-315. doi:10.1016/j.earscirev.2004.06.001, 2005.
- Sluijs, A., Schouten, S., Donders, T.H., Schoon, P.L., Röhl, U., Reichart, G.J., Sangiorgi, F., Kim, J.H., Sinninghe Damsté, J.S. and Brinkhuis, H.: Warm and wet conditions in the Arctic region during Eocene Thermal Maximum 2. *Nature Geoscience*, 2(11), 777-780. doi:10.1038/ngeo668, 2009.
- 710 Sluijs, A., van Roij, L., Frieling, J., Laks, J., and Reichart, G.J.: Single-species dinoflagellate cyst carbon isotope ecology across the Paleocene-Eocene Thermal Maximum, *Geology*, 46, 79-82. doi:10.1130/G39598.1, 2018.
- Sluijs, A., Van Roij, L., Harrington, G.J., Schouten, S., Sessa, J.A., LeVay, L.J., Reichart, G.J. and Slomp, C.P.: Warming, euxinia and sea level rise during the Paleocene–Eocene Thermal Maximum on the Gulf Coastal Plain: implications for ocean oxygenation and nutrient cycling. *Climate of the Past*, 10(4), 1421-1439. doi:10.5194/cp-10-1421-2014, 2014.
- 715 Speijer, R.P., Pälike, H., Hollis, C.J., Hooker, J.J., Ogg, J.G. Chapter 28 - The Paleogene Period, Editor(s): Felix M. Gradstein, James G. Ogg, Mark D. Schmitz, Gabi M. Ogg, *Geologic Time Scale 2020*, Elsevier, 1087-1140, ISBN 9780128243602, doi:10.1016/B978-0-12-824360-2.00028-0, 2020.
- Stap, L., Lourens, L.J., Thomas, E., Sluijs, A., Bohaty, S. and Zachos, J.C.: High-resolution deep-sea carbon and oxygen isotope records of Eocene Thermal Maximum 2 and H2. *Geology*, 38(7), 607-610. doi:10.1130/G30777.1, 2010.





- 720 Stassen, P., Steurbaut, E., Morsi, A.M., Schulte, P. and Speijer, R.: Biotic impact of Eocene Thermal Maximum 2 in a shelf setting (Dababiya, Egypt). *Austrian Journal of Earth Sciences*, 105(1), 154-160, 2012b.  
 Stassen, P., Thomas, E. and Speijer, R.P.: Integrated stratigraphy of the Paleocene-Eocene thermal maximum in the New Jersey Coastal Plain: Toward understanding the effects of global warming in a shelf environment. *Paleoceanography*, 27(4). doi:10.1029/2012PA002323, 2012a.
- 725 Swain, D.L., Langenbrunner, B., Neelin, J.D. and Hall, A.: Increasing precipitation volatility in twenty-first-century California. *Nature Climate Change*, 8(5), 427-433. doi:10.1038/s41558-018-0140-y, 2018.  
 Taylor, K.W., Huber, M., Hollis, C.J., Hernandez-Sanchez, M.T. and Pancost, R.D.: Re-evaluating modern and Palaeogene GDGT distributions: Implications for SST reconstructions. *Global and Planetary Change*, 108, pp.158-174, doi: 10.1016/j.gloplacha.2013.06.011, 2013.
- 730 Thomas, E. and Zachos, J.C.: Was the late Paleocene thermal maximum a unique event?. *Gff*, 122(1), pp.169-170. doi: 10.1080/11035890001221169, 2000.  
 Tipple, B.J., Pagani, M., Krishnan, S., Dirghangi, S.S., Galeotti, S., Agnini, C., Giusberti, L. and Rio, D.: Coupled high-resolution marine and terrestrial records of carbon and hydrologic cycles variations during the Paleocene–Eocene Thermal Maximum (PETM). *Earth and Planetary Science Letters*, 311(1-2), 82-92. doi:10.1016/j.epsl.2011.08.045, 2011.
- 735 Trampush, S.M. and Hajek, E.A.: Preserving proxy records in dynamic landscapes: Modeling and examples from the Paleocene-Eocene Thermal Maximum. *Geology*, 45(11), 967-970. doi:10.1130/G39367.1, 2017.  
 Van der Weijst, C.M., van der Laan, K.J., Peterse, F., Reichart, G.J., Sangiorgi, F., Schouten, S., Veenstra, T.J. and Sluijs, A.: A 15-million-year surface-and subsurface-integrated TEX 86 temperature record from the eastern equatorial Atlantic. *Climate of the Past*, 18(8), pp.1947-1962. doi:10.5194/cp-2021-92, 2022.
- 740 Van Hinsbergen, D. J. J., de Groot, L. V., van Schaik, S. J., Spakman, W., Bijl, P. K., Sluijs, A., Langereis, C. G., and Brinkhuis, H.: A Paleolatitude Calculator for Paleoclimate Studies, *PLOS ONE*, 10, e0126946, doi:10.1371/journal.pone.0126946, 2015.  
 Vervoort, P., Kirtland Turner, S., Rochholz, F. and Ridgwell, A.: Earth System Model Analysis of How Astronomical Forcing Is Imprinted Onto the Marine Geological Record: The Role of the Inorganic (Carbonate) Carbon Cycle and Feedbacks. *Paleoceanography and Paleoclimatology*, 36(10), doi: 10.1029/2020PA004090, 2021.
- 745 Westerhold, T., Röhl, U., Laskar, J., Raffi, I., Bowles, J., Lourens, L.J. and Zachos, J.C.: On the duration of magnetochrons C24r and C25n and the timing of early Eocene global warming events: Implications from the Ocean Drilling Program Leg 208 Walvis Ridge depth transect. *Paleoceanography*, 22(2). doi:10.1029/2006PA001322, 2007.  
 Weijers, J.W., Lim, K.L., Aquilina, A., Sinninghe Damsté, J.S. and Pancost, R.D.: Biogeochemical controls on glycerol dialkyl glycerol tetraether lipid distributions in sediments characterized by diffusive methane flux. *Geochemistry, Geophysics, Geosystems*, 12(10), doi: 10.1029/2011GC003724, 2011.
- 750 Westerhold, T., Röhl, U., Wilkens, R.H., Gingerich, P.D., Clyde, W.C., Wing, S.L., Bowen, G.J., and Kraus, M.J.: Synchronizing early Eocene deep-sea and continental records-cyclostratigraphic age models for the Bighorn Basin Coring Project drill cores. *Climate of the Past*, 14(3), 303-319. doi.org/10.5194/cp-14-303-2018.





- Willard, D.A., Donders, T.H., Reichgelt, T., Greenwood, D.R., Sangiorgi, F., Peterse, F., Nierop, K.G., Frieling, J., Schouten, S. and Sluijs, A.: Arctic vegetation, temperature, and hydrology during Early Eocene transient global warming events. *Global and Planetary Change*, 178, pp.139-152. doi: 10.1016/j.gloplacha.2019.04.012, 2019.
- Williams, G.L., Damassa, S.P., Fensome, R.A. and Guerstein, G.R.: A response to ‘Comment to Wetzeliella and its allies—the ‘hole’ story: a taxonomic revision of the Paleogene dinoflagellate subfamily Wetzelielloideae by Williams et al.(2015)’. *Palynology*, 41(3), 430-437. doi:10.1080/01916122.2017.1283367, 2017.
- Zachos, J. C., Dickens, G. R., and Zeebe, R. E.: An early Cenozoic perspective on greenhouse warming and carbon-cycle dynamics. *Nature* 451, no. 7176 (2008): 279-283. doi:10.1038/nature06588, 2008.
- Zachos, J.C., Schouten, S., Bohaty, S., Quattlebaum, T., Sluijs, A., Brinkhuis, H., Gibbs, S.J., and Bralower, T.J.: Extreme warming of mid-latitude coastal ocean during the Paleocene-Eocene Thermal Maximum: Inferences from TEX86 and isotope data: *Geology*, v. 34, 737–740, doi:10.1130/G22522.1, 2006.
- Zachos, J. C., McCarren, H., Murphy, B., Röhl, U., and Westerhold, T.: Tempo and scale of late Paleocene and early Eocene carbon isotope cycles: Implications for the origin of hyperthermals. *Earth and Planetary Science Letters*, 299(1-2), 242-249, 2010.
- Zachos, J.C., Röhl, U., Schellenberg, S.A., Sluijs, A., Hodell, D.A., Kelly, D.C., Thomas, E., Nicolo, M., Raffi, I., Lourens, L.J. and McCarren, H.: Rapid acidification of the ocean during the Paleocene-Eocene thermal maximum. *Science*, 308(5728), 1611-1615. doi:10.1126/science.1109004, 2005.
- Zeebe, R. E., Lourens, L. J.: Solar System chaos and the Paleocene–Eocene boundary age constrained by geology and astronomy. *Science*, 365(6456), 926-929. doi:10.1126/science.aax0612, 2019.
- Zeebe, R. E., Westerhold, T., Littler, K., and Zachos, J. C.: Orbital forcing of the Paleocene and Eocene carbon cycle, *Paleoceanography*, 32, 440-465, doi:10.1002/2016PA003054, 2017.
- Zhang, Y.G., Zhang, C.L., Liu, X.L., Li, L., Hinrichs, K.U. and Noakes, J.E.: Methane Index: A tetraether archaeal lipid biomarker indicator for detecting the instability of marine gas hydrates. *Earth and Planetary Science Letters*, 307(3-4), pp.525-534, doi: 10.1016/j.epsl.2011.05.031, 2011.
- Zonneveld, K.A., Marret, F., Versteegh, G.J., Bogus, K., Bonnet, S., Bouimetarhan, I., Crouch, E., de Vernal, A., Elshanawany, R., Edwards, L. and Esper, O.: Atlas of modern dinoflagellate cyst distribution based on 2405 data points. Review of *Palaeobotany and Palynology*, 191, 1-197. doi:10.1016/j.revpalbo.2012.08.003, 2013.

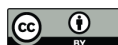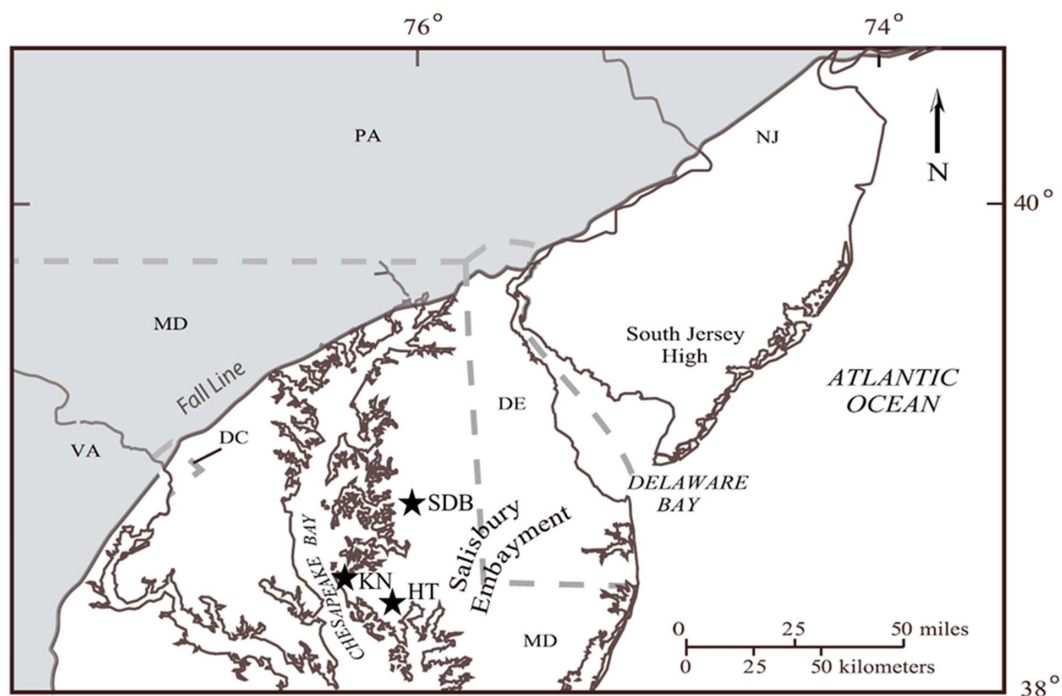

Figure 1: Map showing location of the Knapps Narrows (KN), South Dover Bridge (SDB), and Howards Tract (HT) coreholes. The Fall Line delimits crystalline basement rock (gray) from Cretaceous-Cenozoic age Coastal Plain sediments (white). Modified from Self-Trail et al. 2017b.

785

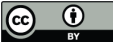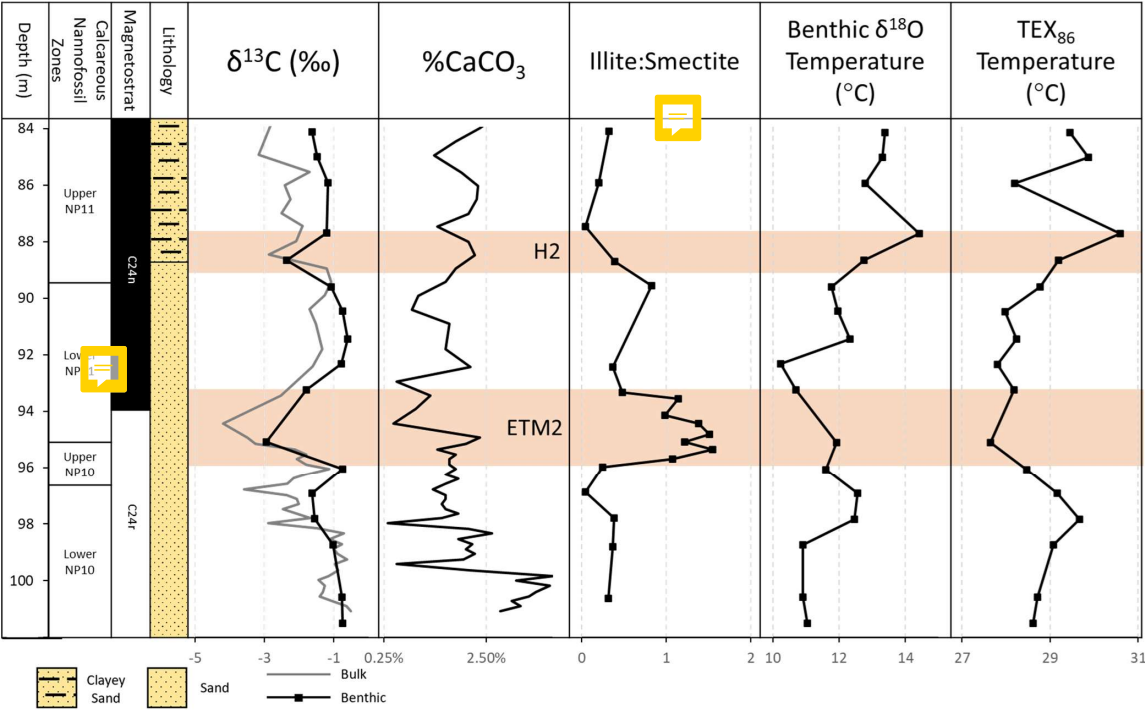

**Figure 2:** Knapps Narrows core site, from left to right: depth, nannofossil zones, magnetostratigraphy, lithology, carbon isotopes, % carbonate, clay mineralogy, benthic  $\delta^{18}\text{O}$  temperatures, and TEX<sub>86</sub> sea surface temperatures over the ETM2 and H2 interval at Knapps Narrows. TEX<sub>86</sub> temperatures use linear calibration from O'Brien et al., (2017). Note logarithmic scale for % carbonate and low carbonate interval at ETM2, spike in illite-smectite ratio at ETM2, agreement between benthic and sea surface temperatures, as well as offsets in timing between carbon isotopes, clay mineralogy, and temperature proxies.

790

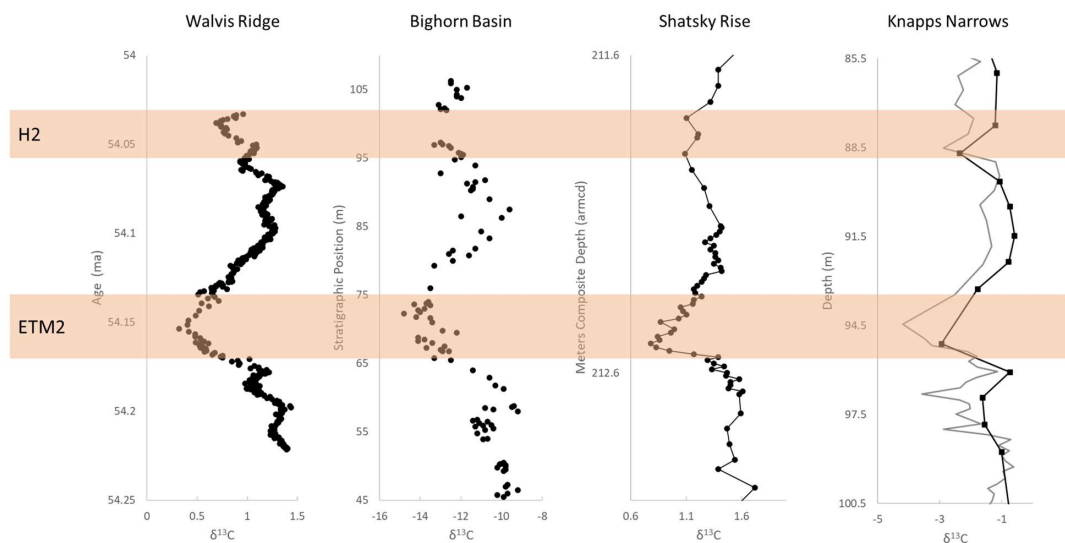

**Figure 3: Carbonate  $\delta^{13}\text{C}$  records of ETM2 and H2 at Walvis Ridge (bulk), Bighorn Basin (pedogenic nodules), Shatsky Rise (benthic), and Knapps Narrows (this study). For Knapps Narrows, bulk carbonate values are in gray and benthic values are in black. Knapps Narrows at 94.5 m was nearly barren of foraminifera. Walvis Ridge data from Stap et al., (2010), age model from Lauretano et al., (2015), Bighorn Basin from Abels et al., (2015), and Shatsky Rise from Westerhold et al., (2018).**

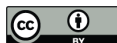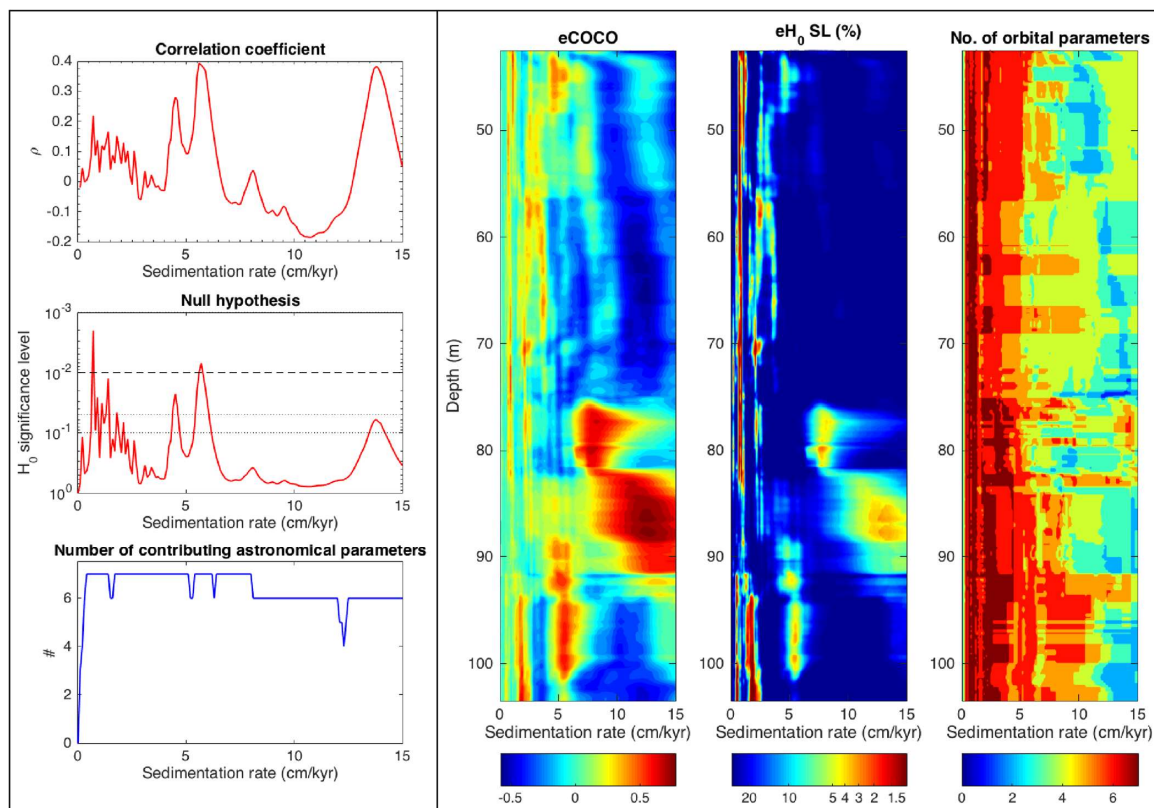

Figure 4: COCO (left panel) and eCOCO (right panel) analysis of the wireline gamma-ray log (42.5 m - 103.5 m). Studied interval lies between 84 m and 102 m. In the COCO plots, three clusters of high- $\rho$  sedimentation rates accompanied with low  $H_0$  significance level and relatively more (# 6-7) of contributing astronomical parameters are identified, i.e., at  $\sim 1$  cm/kyr,  $\sim 5$  cm/kyr, and  $\sim 13$  cm/kyr. For the eCOCO analysis, the sliding window is 18 m using 0.2-m step. The target astronomical solution is La2004 at 53 Ma (with 7 astronomical cycles at 405, 125, 95, 39.2, 23.1, 21.9, and 18.8 kyr, respectively). All periodograms were analyzed with the AR(1) red noise model removed. The number of Monte Carlo simulations is 2000. The tested sedimentation rates range from 0 to 15 cm/kyr with a step of 0.1 cm/kyr. Note that from depth of  $\sim 82$  m – 90 m that covers the studied interval, a change of sedimentation rates exists from  $\sim 5$  cm/kyr to  $\sim 13$  cm/kyr. The evolutionary power spectrum (Supplementary figure 5) of this interval also indicates a distortion of cyclicity.

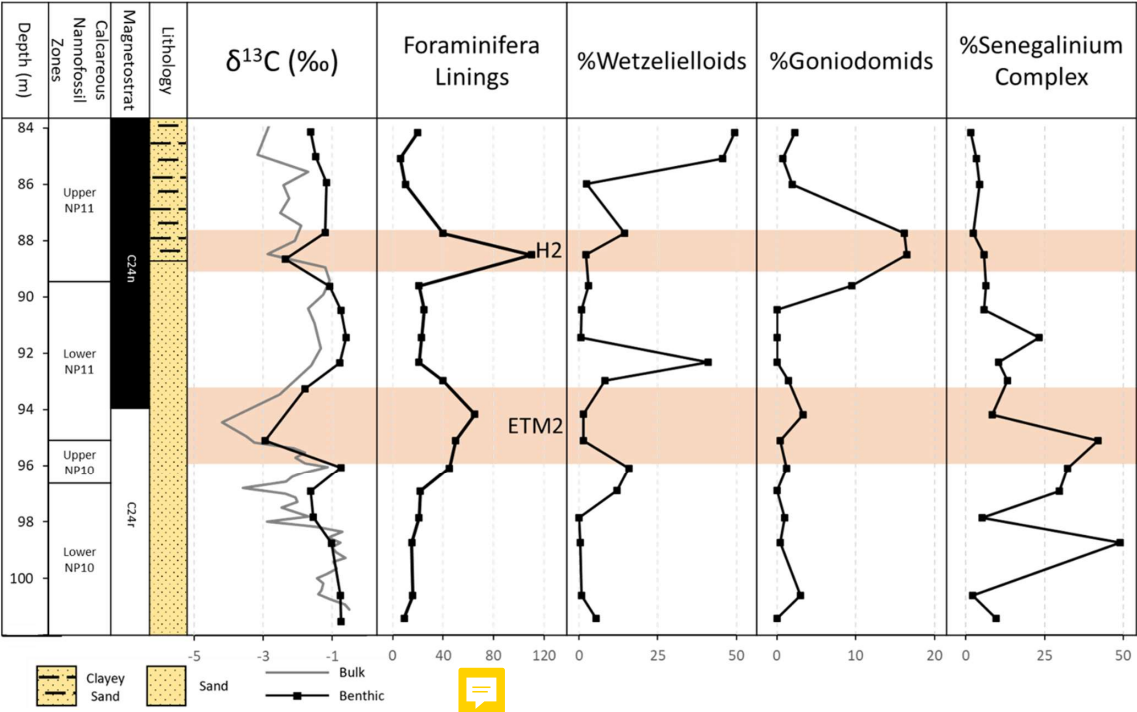

810 Figure 5: From left to right: depth, nannofossil zones, magnetostratigraphy, lithology, carbon isotopes, foraminifera lining counts, relative  
abundance of Wetzeliiellids, relative abundance of Goniodomids, and relative abundance of the Senegalinium Complex. Foraminifera linings can be used to infer periods of rapid or low siliciclastic influx. Wetzeliiellids are associated with periods of high  
815 productivity, Goniodomids are associated with high temperatures and strong salinity stratification, and the Senegalinium complex is associated with low salinity (Frieling and Sluijs, 2018). Of note is a long-term increase in salinity from relatively fresh conditions  
at the base of the core to more saline conditions upsection. Rapid changes in abundance of Wetzeliiellids suggests disconformities,  
periods of non-deposition, or condensed sections.

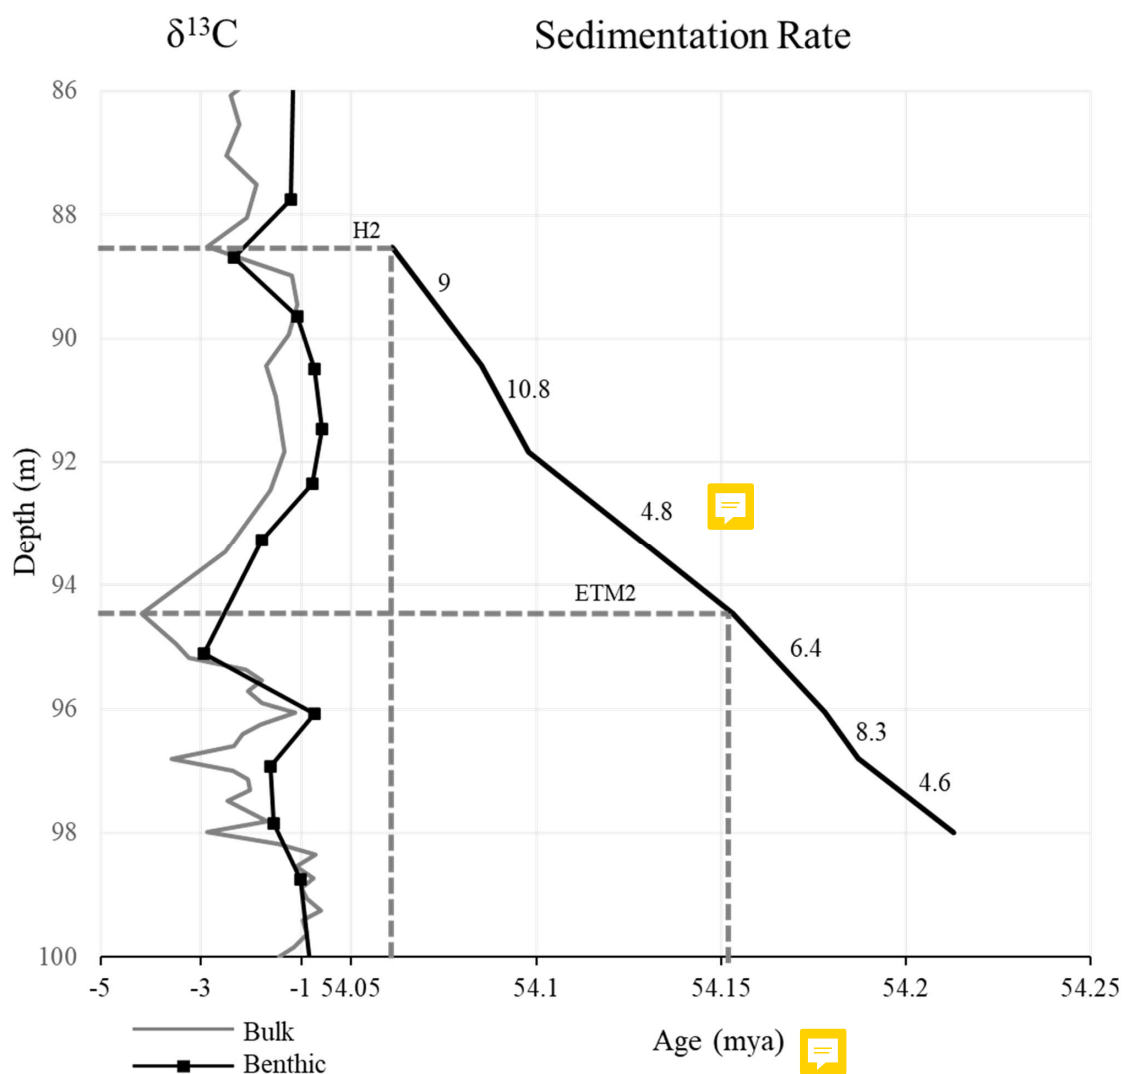

Figure 6: Sedimentation rates in the Knapps Narrows core based on correlations of  $\delta^{13}\text{C}$  inflection points to the age model of Lauretano et al., 2015 at Walvis Ridge Site 391. Sedimentation rates in cm/kyr. Note relative consistency compared to orders of magnitude changes that were documented during the PETM in Stassen et al. (2012b), with moderate increases beginning at 91.8 m, consistent with cyclostratigraphy.

**Appendix 1: Regional calcareous nannofossil biostratigraphy. Locations from figure 1. Note disconformity at base of Knapps Narrows has truncated lower Zone NP10, as indicated by the absence of the Marlboro Clay. Scale shows thickness of sediments in each core in feet as measured from the base of the PETM.**



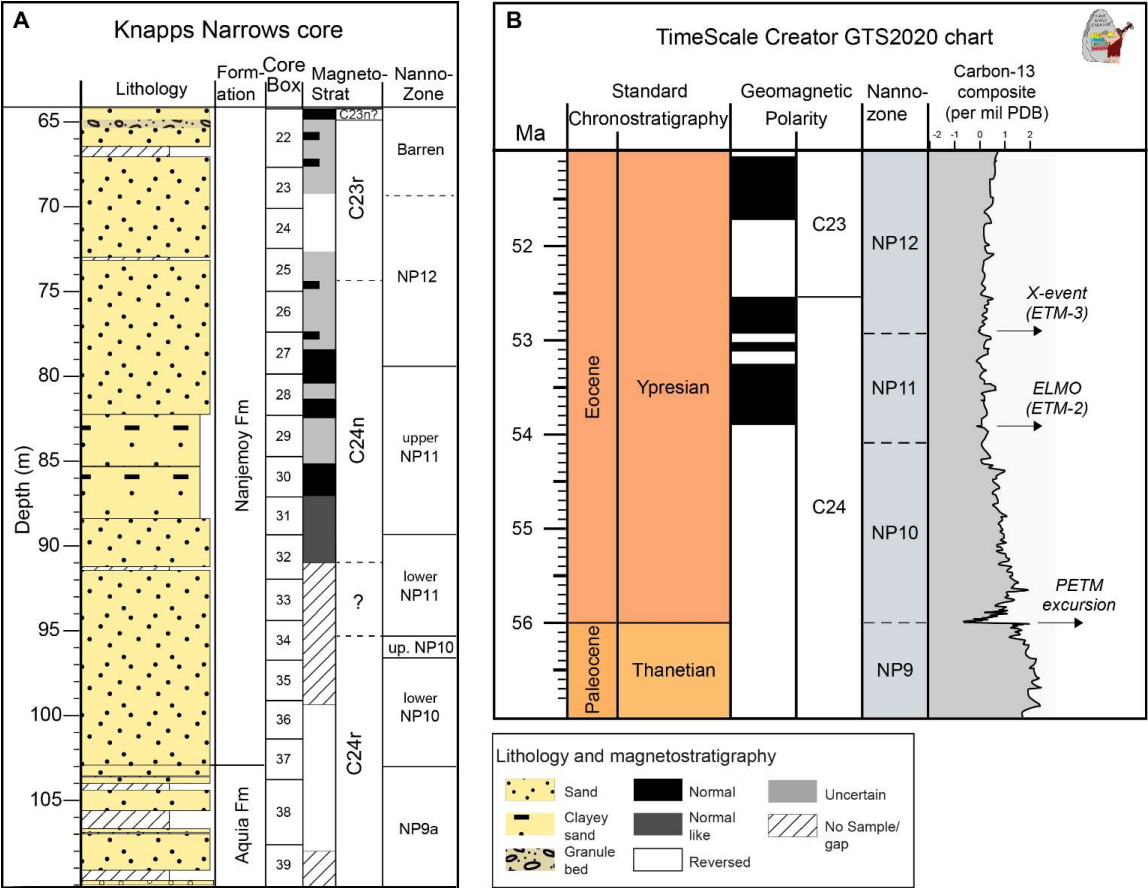

Appendix 2: A) The magnetostratigraphy and calcareous nannofossil zones (nanno-zone) of Knapps Narrows core. Note that the C24r/C24n reversal boundary was not well determined due to a sampling gap, but was well constrained to the interval, where the question mark was placed, based on nannofossils. B) The latest Paleocene to earliest Eocene time scale from GTS2020 (Gradstein et al., 2020) showing the geomagnetic polarity scale, the calcareous nannofossil zones and the composite carbon-13 isotope curve (major carbon-13 excursions and events are also marked). The excursion of ETM2 aligns with the C24r/C24n reversal.

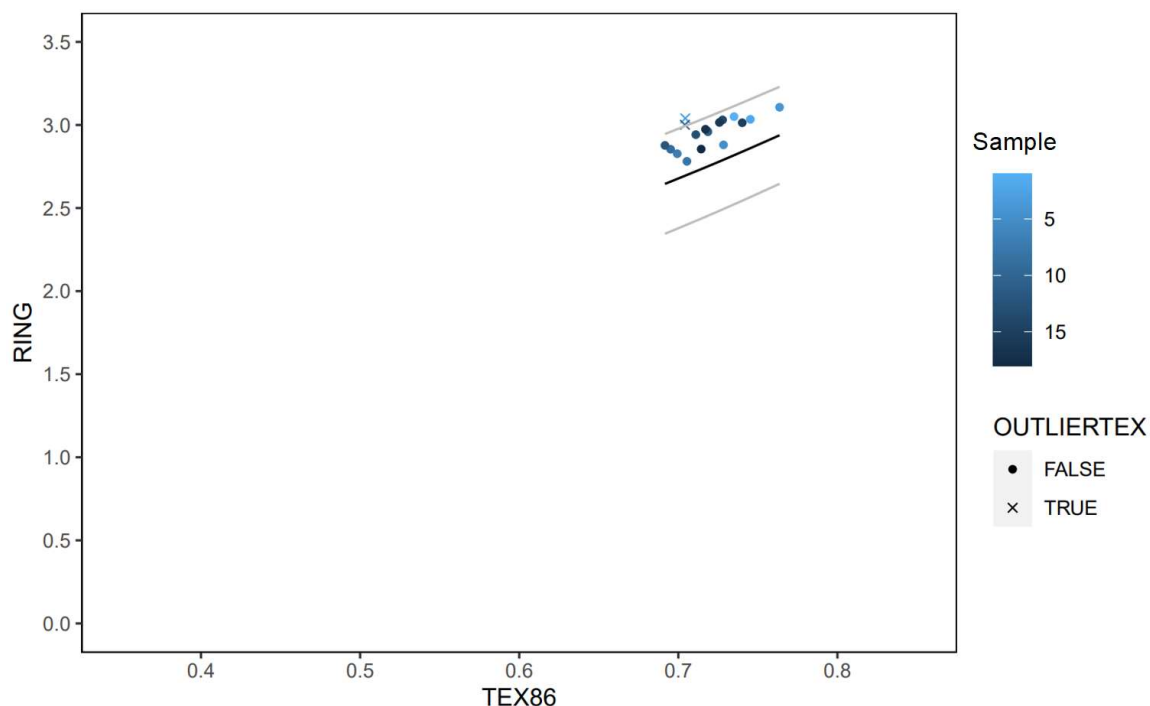

835 **Appendix 3: Ring index (Zhang et al., 2016) plotted against TEX<sub>86</sub> values for Knapps Narrows. Values generally fall within the acceptable range, indicating little non-thermal overprint. The temperature reconstructions obtained from the outliers were in line with independent measurements from  $\delta^{18}\text{O}$ . Moreover, the cut-off to identify anomalous values is rather conservative (Y.G. Zhang, written comm 2022). Therefore, we included these data points in the figures.**

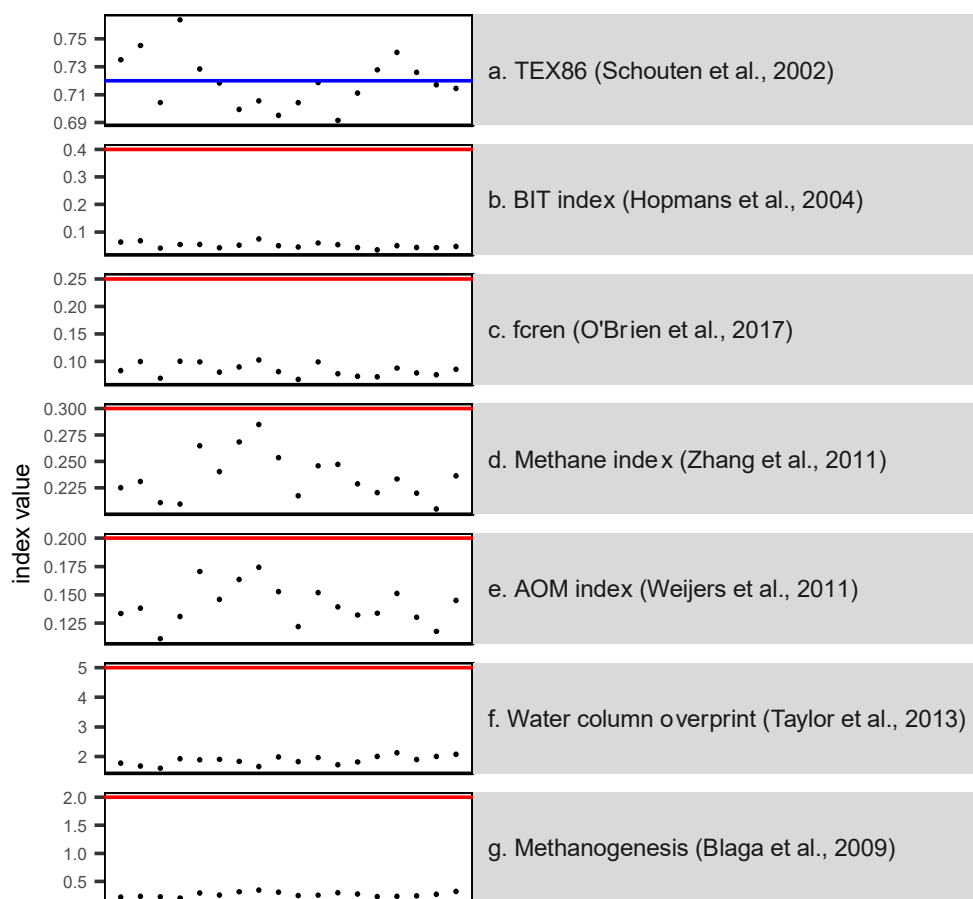

840 **Appendix 4: Analysis of potential confounding factors for TEX86 paleothermometry for all samples. The red line indicates the cutoff**  
 value; red crosses indicate samples exceed the cutoff (a) TEX86, with the blue line indicating the maximum modern core-top value  
 (~ 0.72). (b) Low BIT index values indicate insignificant supply of terrestrial GDGTs (c) fcren' shows no non-thermal contribution  
 of crenarchaeol isomer. (d) Methane index values imply no contribution by methane metabolizing archaea (e) AOM ratio values  
 show no contribution by anaerobic methane oxidizers (f) GDGT-2/3 values show no contributions of deep-dwelling archaea (g) low  
 845 GDGT-0/Cren values show no contribution by methanogenic archaea.

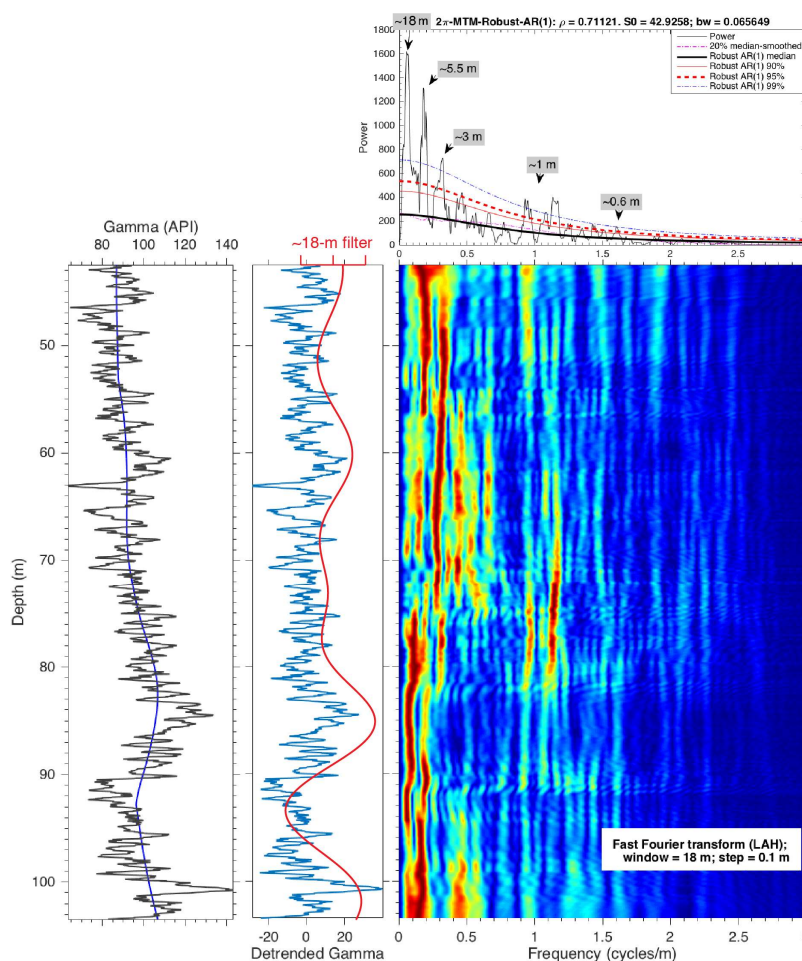

Appendix 5: Spectral analysis of the detrended gamma data of Knapps Narrows core (43.5 m – 103.5 m). From left to right shows, the raw gamma data (solid black line) with the ca. 21-m LOWESS trend (solid blue line), the detrended gamma data overlaid by the ~18-m filter (Gaussian bandwidth at  $0.055 \pm 0.025$ ), and spectral analysis of the detrended series. An interpolation of 0.03 m is applied before the spectral analysis. Evolutionary power spectrum (Fast Fourier transform; Kodama and Hinno, 2015) uses an 18-m window. The  $2\pi$  MTM power spectrum shows that the dominant cycles have wavelengths of ~18 m, ~5.5 m, 3 m, ~1 m and 0.6 m, respectively.
